# Supplementary material for: Incidence of Lyme Borreliosis in Europe: A Systematic Review (2005–2020)
Source: PubMed Central journal article supplement (PMC10122234; doi:10.1089/vbz.2022.0070), 2023-04-12
Supplement: Supp_TableS1-S11.pdf [file Supp_TableS1-S11.pdf]

## Incidence of Lyme borreliosis in Europe: a systematic literature review

### SUPPLEMENT

**Table S1:** Incidence (cases per 100,000 PPY) of LB in sub-national areas of Eastern European countries from literature published from 2005 to 2020

| Country (Ref)      | Sub-national area           | Author Year                 | Data source                   | Study Population                                      | Cases (n) | Study design                              | Study period | Case definition                       | Incidence (95% CI) |
|--------------------|-----------------------------|-----------------------------|-------------------------------|-------------------------------------------------------|-----------|-------------------------------------------|--------------|---------------------------------------|--------------------|
| Czech Republic [1] | Regional Bohemia            | Daniel 2008                 | National surveillance data    | Regional general population                           | 7,391     | Retrospective observational               | 1999-2004    | NR                                    | 12.0 (11.4-12.7)   |
| Poland [2]         | Bialystok North-east Poland | Toczyłowski 2020            | Hospital records              | Children <18 years                                    | 26        | Retrospective cohort, observational       | 2015-2019    | Clinical with laboratory confirmation | 2.5 (1.1-6.0)      |
| Poland [3]         | Lubuskie                    | Zbrzezniak 2019             | Mandatory surveillance system | National general population except Bialystok district | 798       | Retrospective observational, surveillance | 2017         | Surveillance definition               | 78.5               |
|                    | Dolnoslaskie                |                             |                               |                                                       | 852       |                                           |              |                                       | 29.4               |
|                    | Kujawsko-Pomorskie          |                             |                               |                                                       | 545       |                                           |              |                                       | 26.2               |
|                    | Lubelskie                   |                             |                               |                                                       | 1975      |                                           |              |                                       | 92.8               |
|                    | Malopolskie                 |                             |                               |                                                       | 3322      |                                           |              |                                       | 98.1               |
|                    | Mazowieckie                 |                             |                               |                                                       | 2216      |                                           |              |                                       | 41.2               |
|                    | Opolskie                    |                             |                               |                                                       | 644       |                                           |              |                                       | 65                 |
|                    | Podkarpackie                |                             |                               |                                                       | 1480      |                                           |              |                                       | 69.6               |
|                    | Podlaskie                   |                             |                               |                                                       | 1542      |                                           |              |                                       | 130.1              |
|                    | Pomorskie                   |                             |                               |                                                       | 1466      |                                           |              |                                       | 63.2               |
|                    | Slaskie                     |                             |                               |                                                       | 2779      |                                           |              |                                       | 61                 |
|                    | Swietokrzyskie              |                             |                               |                                                       | 450       |                                           |              |                                       | 36                 |
|                    | Warminsko-mazurskie         |                             |                               |                                                       | 1302      |                                           |              |                                       | 90.7               |
|                    | Wielkopolskie               |                             |                               |                                                       | 655       |                                           |              |                                       | 18.8               |
|                    | Zachodniopomorskie          |                             |                               |                                                       | 851       |                                           |              |                                       | 49.9               |
|                    | Ladzkie                     |                             |                               |                                                       | 637       |                                           |              |                                       | 25.7               |
| Poland [4]         | Kujawsko-Pomorskie          | Paradowska-Stankiewicz 2015 | Mandatory surveillance system | National general population                           | 430       | Retrospective cross-sectional             | 2013         | Clinical and laboratory criteria      | 20.5               |
|                    | Lubelskie                   |                             |                               |                                                       | 816       |                                           |              |                                       | 37.8               |
|                    | Lubuskie                    |                             |                               |                                                       | 350       |                                           |              |                                       | 34.2               |
|                    | Malopolskie                 |                             |                               |                                                       | 1817      |                                           |              |                                       | 54.1               |
|                    | Mazowieckie                 |                             |                               |                                                       | 1469      |                                           |              |                                       | 27.2               |
|                    | Opolskie                    |                             |                               |                                                       | 431       |                                           |              |                                       | 42.8               |
|                    | Podkarpackie                |                             |                               |                                                       | 988       |                                           |              |                                       | 46.4               |
|                    | Podlaskie                   |                             |                               |                                                       | 1199      |                                           |              |                                       | 100.2              |
|                    | Pomorskie                   |                             |                               |                                                       | 507       |                                           |              |                                       | 22.1               |

|             |                                       |                |                                                                              |                                                |                                                                |                                                  |                                           |                                     |                           |
|-------------|---------------------------------------|----------------|------------------------------------------------------------------------------|------------------------------------------------|----------------------------------------------------------------|--------------------------------------------------|-------------------------------------------|-------------------------------------|---------------------------|
|             | Wielkopolskie                         |                |                                                                              |                                                | 241                                                            |                                                  |                                           |                                     | 7                         |
|             | Zachodniopomorskie                    |                |                                                                              |                                                | 445                                                            |                                                  |                                           |                                     | 25.9                      |
|             | Dolnośląskie                          |                |                                                                              |                                                | 586                                                            |                                                  |                                           |                                     | 20.1                      |
|             | Łódzkie                               |                |                                                                              |                                                | 291                                                            |                                                  |                                           |                                     | 11.6                      |
|             | Śląskie                               |                |                                                                              |                                                | 2278                                                           |                                                  |                                           |                                     | 49.5                      |
|             | Świętokrzyskie                        |                |                                                                              |                                                | 189                                                            |                                                  |                                           |                                     | 14.9                      |
|             | Warmińsko-Mazurskie                   |                |                                                                              |                                                | 736                                                            |                                                  |                                           |                                     | 50.8                      |
| Poland [5]  | Podlaskie voivodship                  | Krzyzak 2019   | Provincial Sanitary-Epidemiological Station in Białystok. National bulletins | National general population                    | NR                                                             | Retrospective cross-sectional, surveillance      | 2011-2018                                 | Clinical, laboratory, tick exposure | 104.2                     |
|             | Białystok                             |                |                                                                              |                                                |                                                                |                                                  |                                           |                                     | 88.5                      |
|             | Sokolka                               |                |                                                                              |                                                |                                                                |                                                  |                                           |                                     | 172.9                     |
|             | Bielsk Podlaski                       |                |                                                                              |                                                |                                                                |                                                  |                                           |                                     | 198.8                     |
|             | Wysokie Mazowieckie                   |                |                                                                              |                                                |                                                                |                                                  |                                           |                                     | 48.5                      |
|             | Augustów                              |                |                                                                              |                                                |                                                                |                                                  |                                           |                                     | 91.6                      |
|             | Łomża                                 |                |                                                                              |                                                |                                                                |                                                  |                                           |                                     | 38.5                      |
|             | Grajewo                               |                |                                                                              |                                                |                                                                |                                                  |                                           |                                     | 167                       |
|             | Siemiatycze                           |                |                                                                              |                                                |                                                                |                                                  |                                           |                                     | 111                       |
|             | Hajnówka                              |                |                                                                              |                                                |                                                                |                                                  |                                           |                                     | 200.9                     |
|             | Zambrów                               |                |                                                                              |                                                |                                                                |                                                  |                                           |                                     | 29.8                      |
|             | Mońki                                 |                |                                                                              |                                                |                                                                |                                                  |                                           |                                     | 51.1                      |
|             | Kolno                                 |                |                                                                              |                                                |                                                                |                                                  |                                           |                                     | 60                        |
|             | Suwałki                               |                |                                                                              |                                                |                                                                |                                                  |                                           |                                     | 154.5                     |
|             | Sejny                                 |                |                                                                              |                                                |                                                                |                                                  |                                           |                                     | 215.1                     |
| Poland [7]  | Lubuskie                              | Stefanoff 2006 | Routine epidemiological surveillance + Sero-epidemiological studies          | National general population (except Białystok) | 19,052                                                         | Retrospective surveillance, sero-epidemiological | 1999-2005<br>1999<br>2004<br>1999<br>2004 | Clinical, laboratory                | 0.49                      |
|             | Opolskie                              |                |                                                                              |                                                |                                                                |                                                  |                                           |                                     | 12.3                      |
|             |                                       |                |                                                                              |                                                |                                                                |                                                  |                                           |                                     | 1.0                       |
|             |                                       |                |                                                                              |                                                |                                                                |                                                  |                                           |                                     | 16.3                      |
| Romania [8] | Mures county, central-northern region | Tilea, 2014    | 120 consecutive inpatients                                                   | Regional general population                    | 44 (LB)<br>28 (EM)<br>13 (LNB)<br>1 (LC)<br>76 (LB)<br>49 (EM) | Prospective, sero-epidemiological                | 2010<br><br><br><br>2011                  | CDC and EUCALB                      | 7.47<br><br><br><br>12.91 |

14 (LNB)  
2 (LA)

|                      |                                  |                  |                                                                                                                                                |                                                   |            |                               |                                                                                                                                                                                           |                                                        |                                                                                                                                                                         |
|----------------------|----------------------------------|------------------|------------------------------------------------------------------------------------------------------------------------------------------------|---------------------------------------------------|------------|-------------------------------|-------------------------------------------------------------------------------------------------------------------------------------------------------------------------------------------|--------------------------------------------------------|-------------------------------------------------------------------------------------------------------------------------------------------------------------------------|
| Russia [9]           | St. Petersburg                   | Bogachkina 2011  | Centre of Hygiene and Epidemiology, The Directorate of the Federal Service for Surveillance on Consumer Rights Protection and Human Well-Being | General population                                | 487<br>307 | Cross-sectional, Surveillance | 2009<br>2010                                                                                                                                                                              | NR                                                     | 10.7<br>6.7                                                                                                                                                             |
| Slovak Republic [10] | Ružomberok and Liptovský Mikuláš | Bochnickova 2012 | Medical records                                                                                                                                | Patients attending Infectious Disease Departments | 476        | Retrospective cohort          | 1989-2010<br>1989<br>1990<br>1991<br>1992<br>1993<br>1994<br>1995<br>1996<br>1997<br>1998<br>1999<br>2000<br>2001<br>2002<br>2003<br>2004<br>2005<br>2006<br>2007<br>2008<br>2009<br>2010 | Epidemiological history, clinical, laboratory findings | 7.5<br>3.0<br>1.5<br>3<br>0.7<br>2.2<br>6.6<br>16.4<br>52.1<br>9.7<br>10.4<br>3.0<br>14.8<br>11.1<br>9.8<br>9.0<br>18.1<br>30.2<br>25.7<br>32.5<br>42.3<br>24.0<br>21.2 |

ACA, Acrodermatitis chronica atrophicans; CDC, the United States Centers for Disease Control and Prevention; ECG, electrocardiograph; EUCALB, European Union Concerted Action on Lyme borreliosis, EM erythema migrans; LA Lyme arthritis; LC, Lyme carditis; LNB Lyme neuroborreliosis

\*Incidence *proportion* reported, rather than incidence *rate* (person-time).

**Table S2:** Incidence (cases per 100,000 PPY) of LB in sub-national areas of the Baltic States from literature published from 2005 to 2020

| Country (Ref)  | Sub-national area | Author Year        | Data source                                              | Study Population | Cases (n) | Study design                        | Study period      | Case definition                                  | Incidence (95% CI) |
|----------------|-------------------|--------------------|----------------------------------------------------------|------------------|-----------|-------------------------------------|-------------------|--------------------------------------------------|--------------------|
| Lithuania [11] | Vilnius district  | Petruioniene, 2020 | Clinical records, Center of infectious Diseases, Vilnius | Outpatients      | 7424      | Retrospective cohort, observational | 2014-2016<br>2016 | Clinical, laboratory, ECG, skin biopsy findings. | 85.4<br>101.6      |

ACA, Acrodermatitis chronica atrophicans; LB Lyme borreliosis; EM erythema migrans; LA Lyme arthritis; LC, Lyme carditis; LNB Lyme neuroborreliosis.

\*Incidence *proportion* reported, rather than incidence *rate* (person-time).

**Table S3:** Incidence (cases per 100,000 PPY) of LB in sub-national areas of Nordic region countries from literature published from 2005 to 2020

| Country (Ref)         | Sub-national area              | Author Year    | Data source                                                                                                                                                 | Study Population                                             | Cases (n)                           | Study design         | Study period              | Case definition                                      | Incidence (95% CI) |
|-----------------------|--------------------------------|----------------|-------------------------------------------------------------------------------------------------------------------------------------------------------------|--------------------------------------------------------------|-------------------------------------|----------------------|---------------------------|------------------------------------------------------|--------------------|
| Denmark [12]          | Zealand                        | Dessau 2015    | Danish notification system for infectious diseases, Danish microbiology database, Danish civil registration system.                                         | Population of Denmark                                        | 65                                  | Prospective cohort   | 2010-2012                 | LNB                                                  | 2.6                |
|                       | Capital (Denmark)              |                |                                                                                                                                                             | 115                                                          | 2.3                                 |                      |                           |                                                      |                    |
|                       | Southern Denmark               |                |                                                                                                                                                             | 182                                                          | 5.1                                 |                      |                           |                                                      |                    |
|                       | Middle Jutland                 |                |                                                                                                                                                             | 129                                                          | 3.4                                 |                      |                           |                                                      |                    |
|                       | Northern Jutland               |                |                                                                                                                                                             | 35                                                           | 2.0                                 |                      |                           |                                                      |                    |
| Denmark [13]          | Funen                          | Andreasen 2020 | Confirmed LNB cases and controls                                                                                                                            | 10 municipalities of Funen                                   | 401                                 | Case-control         | 1995-2014<br>1998<br>2006 | LNB: Clinical, laboratory confirmation               | 2.33<br>7.93       |
| Denmark [14]          | Islands of Funen and Langeland | Knudtzen 2017  | University Hospital based data                                                                                                                              | LNB cases verified by positive Borrelia intrathecal antibody | 431                                 | Retrospective cohort | 1995-2014                 | Positive CSF IgM and/or IgG                          | 4.7                |
| Denmark [15]          | North Jutland County           | Krabbe 2008    | GP medical records                                                                                                                                          | Patients with LNB North Jutland County                       | 84                                  | Retrospective cohort | 1998-2006                 | Detection of intrathecal antibodies                  | 2.0                |
| Finland [16]          | Åland Islands                  | Sajanti 2017   | 3 Registers: Register for Primary Health Care Visits (Avohilmo); National Infectious Diseases Register (NIDR); National Hospital Discharge Register (Hilmo) | Finnish national general population                          | 11,793 (Avohilmo)/<br>21,051 (NIDR) | Retrospective cohort | 2010-2014                 | GP diagnosed EM/disseminated laboratory conformed LB | 884.6/1597.0       |
|                       | Southwest Finland              |                |                                                                                                                                                             |                                                              |                                     |                      |                           |                                                      | 83.3/46.3          |
|                       | Helsinki and Uusimaa           |                |                                                                                                                                                             |                                                              |                                     |                      |                           |                                                      | 63.1/34.4          |
|                       | Satakunta                      |                |                                                                                                                                                             |                                                              |                                     |                      |                           |                                                      | 28.4/13.2          |
|                       | Satakunta                      |                |                                                                                                                                                             |                                                              |                                     |                      |                           |                                                      | 17.3/3.9           |
|                       | Pirkanmaa                      |                |                                                                                                                                                             |                                                              |                                     |                      |                           |                                                      | 17.1/1.5           |
|                       | Päijät-Häme                    |                |                                                                                                                                                             |                                                              |                                     |                      |                           |                                                      | 29.9/10.8          |
|                       | Kymenlaakso                    |                |                                                                                                                                                             |                                                              |                                     |                      |                           |                                                      | 142.9/56.7         |
|                       | South Karelia                  |                |                                                                                                                                                             |                                                              |                                     |                      |                           |                                                      | 161.8/48.7         |
|                       | Southern Savonia               |                |                                                                                                                                                             |                                                              |                                     |                      |                           |                                                      | 47.0/13.3          |
|                       | Eastern Savonia                |                |                                                                                                                                                             |                                                              |                                     |                      |                           |                                                      | 81.0/14.7          |
|                       | North Karelia                  |                |                                                                                                                                                             |                                                              |                                     |                      |                           |                                                      | 66.4/15.8          |
|                       | Northern Savonia               |                |                                                                                                                                                             |                                                              |                                     |                      |                           |                                                      | 47.5/14.2          |
|                       | Central Finland                |                |                                                                                                                                                             |                                                              |                                     |                      |                           |                                                      | 49.7/7.8           |
|                       | Southern Ostrobothnia          |                |                                                                                                                                                             |                                                              |                                     |                      |                           |                                                      | 18.2/1.8           |
| Vaasa                 | 40.3/31.2                      |                |                                                                                                                                                             |                                                              |                                     |                      |                           |                                                      |                    |
| Central Ostrobothnia  | 29.4/8.7                       |                |                                                                                                                                                             |                                                              |                                     |                      |                           |                                                      |                    |
| Northern Ostrobothnia | 4.8/1.3                        |                |                                                                                                                                                             |                                                              |                                     |                      |                           |                                                      |                    |
| Kainuu                | 4.2/1.8                        |                |                                                                                                                                                             |                                                              |                                     |                      |                           |                                                      |                    |
| Länsi-Pohja           | 10.8/3.1                       |                |                                                                                                                                                             |                                                              |                                     |                      |                           |                                                      |                    |
| Lapland               | 5.5/3.9                        |                |                                                                                                                                                             |                                                              |                                     |                      |                           |                                                      |                    |

|             |                                                                                                 |                |                                                          |                                      |       |                      |           |                            |                  |
|-------------|-------------------------------------------------------------------------------------------------|----------------|----------------------------------------------------------|--------------------------------------|-------|----------------------|-----------|----------------------------|------------------|
| Norway [17] | South-Rogaland,                                                                                 | Tveitnes 2012  | Hospital medical and laboratory records                  | 62,000 children <14 years of age     | 142   | Retrospective cohort | 2001-2009 | Clinical, laboratory (LNB) | 26               |
| Norway [18] | Vestfold, Telemark, Aust-Agderand Vest-Agder                                                    | Eliassen 2017  | GP medical records, surveillance data                    | 4 counties with highest LD incidence | 6,565 | Retrospective cohort | 2005-2009 | LB                         | 19.70 (8.6-30.9) |
|             |                                                                                                 |                |                                                          |                                      |       |                      | 2005      |                            | 22.1 (10.9-37.8) |
|             |                                                                                                 |                |                                                          |                                      |       |                      | 2006      |                            | 22.6 (6.3-42)    |
|             |                                                                                                 |                |                                                          |                                      |       |                      | 2007      |                            | 21.4 (8.5-37.9)  |
|             |                                                                                                 |                |                                                          |                                      |       |                      | 2008      |                            | 18.9 (4.4-36)    |
|             |                                                                                                 |                |                                                          |                                      |       |                      | 2009      |                            | 13.4 (13.1-14.3) |
|             |                                                                                                 |                |                                                          |                                      |       |                      | 2005-2009 | EM                         | 448 (339-574)    |
|             |                                                                                                 |                |                                                          |                                      |       |                      | 2005      |                            | 353 (257-426)    |
|             |                                                                                                 |                |                                                          |                                      |       |                      | 2006      |                            | 552 (399-714)    |
|             |                                                                                                 |                |                                                          |                                      |       |                      | 2007      |                            | 450 (371-571)    |
|             |                                                                                                 |                |                                                          |                                      |       |                      | 2008      |                            | 455 (320-627)    |
|             |                                                                                                 |                |                                                          |                                      |       |                      | 2009      |                            | 431 (328-541)    |
| Sweden [19] | South-East Sweden, Blekinge County                                                              | Bennet 2006    | Electronic medical records                               | Primary healthcare clinics           | 3,437 | Retrospective cohort | 1997-2002 | EM – CDC, EUCALB           | 464              |
|             |                                                                                                 |                |                                                          |                                      |       |                      | 1997      |                            | 364              |
|             |                                                                                                 |                |                                                          |                                      |       |                      | 1998      |                            | 400              |
|             |                                                                                                 |                |                                                          |                                      |       |                      | 1999      |                            | 264              |
|             |                                                                                                 |                |                                                          |                                      |       |                      | 2000      |                            | 664              |
|             |                                                                                                 |                |                                                          |                                      |       |                      | 2001      |                            | 464              |
|             |                                                                                                 |                |                                                          |                                      |       |                      | 2002      |                            | 632              |
| Sweden [20] | Gothenburg or Åcker, Kung, Tjrn, Stenungsund, Ale, Lerum, Partille, HÅryda, MÅlndal, Kungsbacka | Sodermark 2017 | Medical records of children (< 15 years) treated for LNB | Gothenburg and regional hospitals    | 548   | Retrospective cohort | 2002-2014 | Clinical                   | 28               |
|             |                                                                                                 |                |                                                          |                                      |       |                      | 2005      |                            | 42               |
|             |                                                                                                 |                |                                                          |                                      |       |                      | 2010      |                            | 14               |

CDC, the United States Centers for Disease Control and Prevention; CI, confidence interval; CSF, cerebrospinal fluid; EM, erythema migrans; EUCALB, European Union Concerted Action on Lyme borreliosis; GP, general practices; LNB, Lyme neuroborreliosis; Avohilmo, Register for Primary Health Care Visits; NIDR, National Infectious Diseases Register

\*Incidence *proportion* reported, rather than incidence *rate* (person-time).

**Table S4:** Incidence (cases per 100,000 PPY) of LB in sub-national areas of the UK and Ireland from literature published from 2005 to 2020

| Country (Ref)       | Sub-national area       | Author Year   | Data source                                                                                                             | Study Population                          | Cases (n)        | Study design                               | Study period | Case definition                              | Incidence (95% CI) |
|---------------------|-------------------------|---------------|-------------------------------------------------------------------------------------------------------------------------|-------------------------------------------|------------------|--------------------------------------------|--------------|----------------------------------------------|--------------------|
| Ireland [21]        | Connemara               | Vellinga 2018 | All LB tests University Hospitals Galway laboratory                                                                     | 2,314,374 requests over the 5-year period | 242              | Prospective cohort                         | 2010-2014    | EIA and LIA for IgG or IgM.                  | 43                 |
|                     | Loughrea                |               |                                                                                                                         |                                           |                  |                                            |              |                                              | 12                 |
|                     | County Roscommon        |               |                                                                                                                         |                                           |                  |                                            |              |                                              | 11                 |
|                     | West of Ireland overall |               |                                                                                                                         |                                           |                  |                                            |              |                                              | 2                  |
| Scotland [22]       | Ayrshire & Arran        | Mavin 2015    | National Lyme Borreliosis Testing laboratory and questionnaires from all laboratory confirmed cases within NHS Highland | Scotland national general population      | 42               | Retrospective cohort, sero-epidemiological | 2008-2013    | ELISA (IgM/IgG), then immunoblot             | 1.9                |
|                     | Tayside                 |               |                                                                                                                         |                                           | 223              |                                            |              |                                              | 9.2                |
|                     | Dumfries & Galloway     |               |                                                                                                                         |                                           | 56               |                                            |              |                                              | 6.3                |
|                     | Lothian                 |               |                                                                                                                         |                                           | 163              |                                            |              |                                              | 3.3                |
|                     | Fife                    |               |                                                                                                                         |                                           | 45               |                                            |              |                                              | 2.1                |
|                     | Greater Glasgow & Clyde |               |                                                                                                                         |                                           | 320              |                                            |              |                                              | 4.5                |
|                     | Highlands               |               |                                                                                                                         |                                           | 831              |                                            |              |                                              | 44.1               |
|                     | Lanarkshire             |               |                                                                                                                         |                                           | 59               |                                            |              |                                              | 1.7                |
|                     | Borders                 |               |                                                                                                                         |                                           | 21               |                                            |              |                                              | 3.1                |
|                     | Western Isles           |               |                                                                                                                         |                                           | 22               |                                            |              |                                              | 13.8               |
|                     | Forth Valley            |               |                                                                                                                         |                                           | 26               |                                            |              |                                              | NR                 |
| Grampian            | 57                      | NR            |                                                                                                                         |                                           |                  |                                            |              |                                              |                    |
| Scotland [23]       | Highlands               | Milner 2009   | Surveillance data National Lyme Borreliosis Testing Laboratory at Raigmore Hospital in Inverness.                       | Scotland population                       | NR               | Cohort, Sero-epidemiological, Surveillance | 2007-2008    | LB as assessed by serology/Western blot      | 43.4               |
| Scotland [24]       | Highlands               | Slack 2011    | National LB testing Laboratory, Medical microbiology Department at Ninewells Hospital & Medical School, Dundee          | Samples from Tayside and the Highlands    | 78               | Retrospective Longitudinal                 | 2006-2007    | Weak positive or positive Western blot       | 25.4               |
|                     |                         |               |                                                                                                                         | April 2001-March 2010                     | 175              |                                            | 2009-2010    |                                              | 56.4               |
|                     | Rest of Scotland        |               |                                                                                                                         | 10                                        | 2001-2002        |                                            | 2.57         |                                              |                    |
|                     |                         |               |                                                                                                                         | 67                                        | 2009-2010        |                                            | 16.8         |                                              |                    |
|                     |                         |               |                                                                                                                         | -                                         | 2005-2006        |                                            | 0.8          |                                              |                    |
| United Kingdom [25] | South West              | Cairns 2019   | CPRD                                                                                                                    | 8% of the population                      | 248              | Retrospective                              | 2010-2012    | Read codes for LB, suspected and possible LB | 23.4 (20.6-26.6)   |
|                     | London                  |               |                                                                                                                         | 117                                       | 7.7 (6.3-9.3)    |                                            |              |                                              |                    |
|                     | South East England      |               |                                                                                                                         | 425                                       | 13.9 (12.9-15.3) |                                            |              |                                              |                    |
|                     | West Midlands           |               |                                                                                                                         | 108                                       | 8.1 (6.6-9.8)    |                                            |              |                                              |                    |
|                     |                         |               |                                                                                                                         | 70                                        | 6.3 (4.9-8.0)    |                                            |              |                                              |                    |
|                     | North                   |               |                                                                                                                         | 162                                       | 6.3 (5.3-7.3)    |                                            |              |                                              |                    |

CI, confidence interval; CRPD, Clinical Practice Research Database; ELISA, enzyme linked immunosorbent assay; LB, Lyme borreliosis; LIA, line immunoassay; NR, not reported.

\*Incidence *proportion* reported, rather than incidence *rate* (person-time).



**Table S5:** Incidence (cases per 100,000 PPY) of LB in sub-national areas of Southern European countries from literature published from 2005 to 2020

| Country (Ref)            | Sub-national area              | Author Year        | Data source                                                            | Study Population                                                  | Cases (n) | Study design              | Study period | Case definition | Incidence |
|--------------------------|--------------------------------|--------------------|------------------------------------------------------------------------|-------------------------------------------------------------------|-----------|---------------------------|--------------|-----------------|-----------|
| Republic of Croatia [26] | Sibensko-kninska               | Mulic 2011         | Mandatory reporting to Croatian Institute for Public Health and Health | National general population                                       | 0         | Retrospective cohort      | 1999-2008    | NR              | 0         |
|                          | Osjecko-Baranjska              |                    |                                                                        | 71                                                                | 2.1       |                           |              |                 |           |
|                          | Viroviticko podravska          |                    |                                                                        | 57                                                                | 6.1       |                           |              |                 |           |
|                          | Istarska                       |                    |                                                                        | 58                                                                | 2.8       |                           |              |                 |           |
|                          | Vukovarsko-Srijemska           |                    |                                                                        | 35                                                                | 1.7       |                           |              |                 |           |
|                          | Krapina-Zagorje                |                    |                                                                        | 362                                                               | 25.4      |                           |              |                 |           |
|                          | Zadarska                       |                    |                                                                        | 2                                                                 | 0.1       |                           |              |                 |           |
|                          | Zagreb                         |                    |                                                                        | 301                                                               | 9.7       |                           |              |                 |           |
|                          | City of Zagreb                 |                    |                                                                        | 992                                                               | 12.7      |                           |              |                 |           |
|                          | Bjelovarsko-Bilogorska         |                    |                                                                        | 56                                                                | 4.2       |                           |              |                 |           |
|                          | Koprivnicko-krizevacka         |                    |                                                                        | 255                                                               | 20.5      |                           |              |                 |           |
|                          | Primorsko-goranska             |                    |                                                                        | 191                                                               | 6.3       |                           |              |                 |           |
|                          | Pozesko-Slavonska              |                    |                                                                        | 35                                                                | 4.1       |                           |              |                 |           |
|                          | Licko-senjska                  |                    |                                                                        | 3                                                                 | 0.6       |                           |              |                 |           |
|                          | Karlovacka                     |                    |                                                                        | 67                                                                | 4.7       |                           |              |                 |           |
|                          | Sisacko-moslavacka             |                    |                                                                        | 65                                                                | 3.5       |                           |              |                 |           |
|                          | Spliskot-Dalmatinska           |                    |                                                                        | 13                                                                | 0.3       |                           |              |                 |           |
|                          | Dubrovačko-neretvanska         |                    |                                                                        | 6                                                                 | 0.5       |                           |              |                 |           |
|                          | Medimurska                     |                    |                                                                        | 223                                                               | 18.8      |                           |              |                 |           |
|                          | Varaždinska                    |                    |                                                                        | 68                                                                | 3.7       |                           |              |                 |           |
| Brodsko-posavska         | 47                             | 2.7                |                                                                        |                                                                   |           |                           |              |                 |           |
| Republic of Croatia [27] | Bjelovarsko-bilogorska county  | Ropac 2013         | Institute of Public Health, Bjelovar-Bilogora                          | 3% of the national general population                             | 32        | Retrospective             | 2007-2011    | EM              | 4.5       |
| Italy [28]               | Lombardy                       | Zanzani 2019       | The Rare Disease Register of the Lombardy Region.                      | National general population                                       | 189       | Prospective observational | 2000-2015    | Codes and       | 0.124     |
|                          |                                |                    |                                                                        |                                                                   |           |                           |              | Read codes      | 0.03      |
|                          |                                |                    |                                                                        |                                                                   |           |                           |              | specific to     | 0.26      |
|                          | Lodi province Sondrio province |                    |                                                                        |                                                                   |           |                           | 2000-2015    | Lyme disease    | 0.03      |
| Spain [29,30]            | Lugo Province                  | Vazquez-Lopez 2015 | Medical records                                                        | Persons with a positive Western Blot, inpatients with possible LB | 108 (LB)  | Retrospective cohort      | 2007         | CDC             | 2.6       |
|                          |                                |                    |                                                                        |                                                                   |           |                           | 2012         |                 | 11.6      |
| Spain [31]               | Lugo Province                  | Vazquez-Lopez 2016 | Hospital medical records                                               | Children (<15 years)                                              | 10        | Retrospective cohort      | 2006-2013    | CDC             | 5.5       |

CDC, the United States Centers for Disease Control and Prevention; EM, erythema migrans; EUCALB, European Union Concerted Action on Lyme borreliosis; LA, Lyme arthritis; LB, Lyme borreliosis; NR, not reported.

\*Incidence *proportion* reported, rather than incidence *rate* (person-time).

**Table S6:** Incidence (cases per 100,000 PPY) of LB in sub-national areas of Western/Central European countries from literature published from 2005 to 2020

| Country (Ref)    | Sub-national area                                                                | Author Year   | Data source                                                                                | Study Population                                                  | Cases (n) | Study design                | Study period | Case definition                       | Incidence (95% CI)  |
|------------------|----------------------------------------------------------------------------------|---------------|--------------------------------------------------------------------------------------------|-------------------------------------------------------------------|-----------|-----------------------------|--------------|---------------------------------------|---------------------|
| Belgium [32]     | East Flanders<br>Limburg<br>Flemish region<br>Walloon region<br>Brussels Capital | Geebelen 2019 | Belgian network of sentinel GPs                                                            | National general population (inhabitants, 1.3% of the population) | 420       | Retrospective observational | 2015-2017    | EM: EUCALB                            | 30.9 (21.4-40.3)    |
|                  |                                                                                  |               |                                                                                            |                                                                   |           |                             |              |                                       | 390.9 (329.7-451.9) |
|                  |                                                                                  |               |                                                                                            |                                                                   |           |                             |              |                                       | 126 (101.0-150.9)   |
|                  |                                                                                  |               |                                                                                            |                                                                   |           |                             |              |                                       | 74.2 (68.3-80.1)    |
| 34.0 (28.4-39.6) |                                                                                  |               |                                                                                            |                                                                   |           |                             |              |                                       |                     |
| France [33]      | Alsace                                                                           | Raguet 2018   | GP surveillance (388 GPs)                                                                  | National general population                                       | 672 (LB)  | Retrospective cohort        | 2014-2015    | EUCALB                                | 117(109-126)        |
|                  |                                                                                  |               |                                                                                            |                                                                   | 530 (EM)  |                             |              |                                       | 121 (109-133)       |
|                  |                                                                                  |               |                                                                                            |                                                                   | 68 (LA)   |                             |              |                                       | 113 (101-125)       |
|                  |                                                                                  |               |                                                                                            |                                                                   | 54 (LNB)  |                             |              |                                       |                     |
|                  |                                                                                  |               |                                                                                            |                                                                   | 6 (ACA)   |                             |              |                                       |                     |
|                  |                                                                                  |               |                                                                                            |                                                                   | 1 (LC)    |                             |              |                                       |                     |
| 1 (ophthalmic)   |                                                                                  |               |                                                                                            |                                                                   |           |                             |              |                                       |                     |
| France [34]      | Limousin<br>Alsace<br>Pays de la Loire<br>Provence-Alpes-Côtes-d'Azur            | Septfons 2019 | National Sentinel GP network (2011-2016), national hospital discharge database (2005-2016) | National general population                                       | 667       | Retrospective observational | 2011-2016    | Clinical with laboratory confirmation | 239 (68-410)        |
|                  |                                                                                  |               |                                                                                            |                                                                   |           |                             |              |                                       | 148 (45-251)        |
|                  |                                                                                  |               |                                                                                            |                                                                   |           |                             |              |                                       | 5 (0-27)            |
|                  |                                                                                  |               |                                                                                            |                                                                   |           |                             |              |                                       | 8 (0-20)            |
| France [35]      | Meuse                                                                            | Beytout 2007  | Physician reports to the National Reference Center                                         | Residents of 2 rural regions                                      | 25 (LB)   | Prospective cohort          | 2003         | EUCALB                                | 84 (47-121)         |
|                  |                                                                                  |               |                                                                                            |                                                                   | 16 (EM)   |                             |              |                                       |                     |
|                  |                                                                                  |               |                                                                                            |                                                                   | 1 (LA)    |                             |              |                                       |                     |
|                  |                                                                                  |               |                                                                                            |                                                                   | 49 (LB)   |                             |              |                                       | 156 (85-227)        |
|                  |                                                                                  |               |                                                                                            |                                                                   | 37 (EM)   |                             |              |                                       |                     |
|                  |                                                                                  |               |                                                                                            |                                                                   | 1 (LA)    |                             |              |                                       |                     |
|                  | 1 (LC)                                                                           |               |                                                                                            |                                                                   |           |                             |              |                                       |                     |
|                  | 35 (LB)                                                                          | 106 (55-157)  |                                                                                            |                                                                   |           |                             |              |                                       |                     |
|                  | 28 (EM)                                                                          |               |                                                                                            |                                                                   |           |                             |              |                                       |                     |
|                  | 90 (LB)                                                                          | 117 (76-159)  |                                                                                            |                                                                   |           |                             |              |                                       |                     |
|                  | 51 (EM)                                                                          |               |                                                                                            |                                                                   |           |                             |              |                                       |                     |
|                  | 1 (LA)                                                                           |               |                                                                                            |                                                                   |           |                             |              |                                       |                     |
| 1 (LC)           |                                                                                  |               |                                                                                            |                                                                   |           |                             |              |                                       |                     |
| 1 (LNB)          |                                                                                  |               |                                                                                            |                                                                   |           |                             |              |                                       |                     |
| 62 (LB)          | 76 (38-114)                                                                      |               |                                                                                            |                                                                   |           |                             |              |                                       |                     |
| 33 EM)           |                                                                                  |               |                                                                                            |                                                                   |           |                             |              |                                       |                     |
| 4 (LA)           |                                                                                  |               |                                                                                            |                                                                   |           |                             |              |                                       |                     |
| 1 (LNB)          |                                                                                  |               |                                                                                            |                                                                   |           |                             |              |                                       |                     |
| France           | Franche-Comté                                                                    | Tessier 2018  |                                                                                            |                                                                   | 432 (LB)  |                             | 2010-2012    | EUCALB                                | 85 (77-92)          |

| Country (Ref) | Sub-national area                    | Author Year      | Data source                                                                       | Study Population                               | Cases (n)                                                                                         | Study design                                | Study period      | Case definition                                     | Incidence (95% CI)        |
|---------------|--------------------------------------|------------------|-----------------------------------------------------------------------------------|------------------------------------------------|---------------------------------------------------------------------------------------------------|---------------------------------------------|-------------------|-----------------------------------------------------|---------------------------|
| [36]          |                                      |                  | GP-based sentinel surveillance                                                    | Regional population attending GPs              | 392 (EM)<br>4 (LA)<br>31 (LNB)<br>3 (Lymphocytoma)<br>1 (ACA)                                     | Prospective cohort                          |                   |                                                     | 73<br>77<br>100<br>113    |
| France [37]   | Alsace                               | Schmitt 2006     | GP-based sentinel surveillance                                                    | Regional population attending GPs              | 1,365 (LB)<br>891 (EM)<br>291 (LA)<br>254 (LNB)<br>29 (Cutaneous-secondary or tertiary)<br>3 (LC) | Prospective cohort                          | 2001-2003         | EUCALB                                              | 180<br>(30-511 by canton) |
|               | Limousin                             |                  |                                                                                   |                                                | 217 (LB)<br>170 (EM)                                                                              |                                             |                   |                                                     | NR                        |
|               | National                             | Letrilliart 2005 | French Sentinels Network: 1178 sentinel GPs                                       | National general population                    | 86                                                                                                | Prospective cohort                          | 1999-2000         | CDC, EUCALB                                         | 9.4 (7.4-11.4)            |
| France [38]   | Provence-Alpes-Côte d'Azur<br>Alsace |                  |                                                                                   |                                                |                                                                                                   |                                             |                   |                                                     | 0 (0-7)<br>86 (51-134)    |
| Germany [39]  | Brandenburg                          | Fulop 2008       | Notifications to the Robert Koch Institute                                        | Population of 6 regions where LB is notifiable | 23,394                                                                                            | Cross-sectional; Retrospective surveillance | 2002-2006<br>2006 | EUCALB                                              | 77.6                      |
|               | Berlin                               |                  |                                                                                   |                                                |                                                                                                   |                                             | 2006              |                                                     | 5.7                       |
| Germany [40]  | Bavaria                              | Heinzinger 2017  | Sentinel Lyme Disease Incidence Study initiated in mid-2012, routine surveillance | Regional general population                    | 16,439 (LB)<br>15,797 (EM)<br>373 (LA)<br>302 (LNB)                                               | Retrospective cohort, surveillance          | 2013-2016         | EM: clinical only, LNB, LA: clinical and laboratory | 34                        |

| Country (Ref) | Sub-national area             | Author Year  | Data source                                | Study Population                               | Cases (n)   | Study design                       | Study period | Case definition               | Incidence (95% CI) |
|---------------|-------------------------------|--------------|--------------------------------------------|------------------------------------------------|-------------|------------------------------------|--------------|-------------------------------|--------------------|
| Germany [41]  | 6 states                      | Mehnert 2005 | Notifications to the Robert Koch Institute | Population of 6 regions where LB is notifiable | 3019        | Retrospective                      | 2002         | Clinical and/or lab confirmed |                    |
|               | Berlin                        |              |                                            |                                                | 3968        |                                    | 2003         |                               | 2.0                |
|               | Brandenburg                   |              |                                            |                                                |             |                                    | 2002         |                               | 3.0                |
|               |                               |              |                                            |                                                |             |                                    | 2003         |                               | 56.7               |
|               | Meckl. Vorpommern             |              |                                            |                                                |             |                                    | 2002         |                               | 71.7               |
|               |                               |              |                                            |                                                |             |                                    | 2003         |                               | 7.4                |
|               | Sachsen                       |              |                                            |                                                |             |                                    | 2002         |                               | 8.7                |
|               |                               |              |                                            |                                                |             |                                    | 2003         |                               | 23.8               |
|               | Sachsen Anhalt                |              |                                            |                                                |             |                                    | 2002         |                               | 29.6               |
|               |                               |              |                                            |                                                |             |                                    | 2003         |                               | 12.3               |
| Thuringen     |                               | 2002         | 12.9                                       |                                                |             |                                    |              |                               |                    |
|               |                               | 2002         | 0.3                                        |                                                |             |                                    |              |                               |                    |
|               |                               | 2003         | 10.2                                       |                                                |             |                                    |              |                               |                    |
| Germany [42]  | All regions                   | Adlhoch 2010 | Notifications to the Robert Koch Institute | Population of 6 regions where LB is notifiable | 16,461 (LB) | Retrospective cohort, surveillance | 2007-2009    |                               | -                  |
|               | Berlin                        |              |                                            |                                                | 69          |                                    | 2002         | LB, EM, LNB                   | 2.0                |
|               |                               |              |                                            |                                                | 103         |                                    | 2003         | LB, EM, LNB                   | 3.0                |
|               |                               |              |                                            |                                                | 163         |                                    | 2004         | LB, EM, LNB                   | 4.8                |
|               |                               |              |                                            |                                                | 226         |                                    | 2005         | LB, EM, LNB                   | 6.7                |
|               |                               |              |                                            |                                                | 173         |                                    | 2006         | LB, EM, LNB                   | 5.1                |
|               |                               |              |                                            |                                                | 137         |                                    | 2007         | LB, EM, LNB                   | 4.0                |
|               |                               |              |                                            |                                                | 103         |                                    | 2008         | LB, EM, LNB                   | 3.0                |
|               |                               |              |                                            |                                                | 79          |                                    | 2009         | LB, LA, EM, LNB               | 2.3                |
|               |                               |              |                                            |                                                | Brandenburg |                                    | 1,467        | 2002                          | LB, EM, LNB        |
|               | 1,860                         |              |                                            |                                                |             |                                    | 2003         | LB, EM, LNB                   | 72.2               |
|               | 2,024                         |              |                                            |                                                |             |                                    | 2004         | LB, EM, LNB                   | 78.8               |
|               | 2,306                         |              |                                            |                                                |             |                                    | 2005         | LB, EM, LNB                   | 90.1               |
|               | 2,193                         |              |                                            |                                                |             |                                    | 2006         | LB, EM, LNB                   | 86.1               |
|               | 2,048                         |              |                                            |                                                |             |                                    | 2007         | LB, EM, LNB                   | 80.8               |
|               | 1,787                         |              |                                            |                                                |             |                                    | 2008         | LB, EM, LNB                   | 70.8               |
|               | 1,797                         |              |                                            |                                                |             |                                    | 2009         | LB, LA, EM, LNB               | 71.2               |
|               | Mecklenburg-Western Pomerania |              |                                            |                                                |             |                                    | 129          | 2002                          | LB, EM, LNB        |
|               |                               |              |                                            |                                                | 151         |                                    | 2003         | LB, EM, LNB                   | 8.7                |
|               |                               |              |                                            |                                                | 180         |                                    | 2004         | LB, EM, LNB                   | 10.5               |
|               |                               |              |                                            |                                                | 374         |                                    | 2005         | LB, EM, LNB                   | 21.9               |
|               |                               |              |                                            |                                                | 453         |                                    | 2006         | LB, EM, LNB                   | 26.7               |
|               |                               |              |                                            |                                                | 529         |                                    | 2007         | LB, EM, LNB                   | 31.5               |
|               |                               |              |                                            |                                                | 650         |                                    | 2008         | LB, EM, LNB                   | 39.1               |

| Country (Ref)    | Sub-national area             | Author Year  | Data source                                    | Study Population                                     | Cases (n)                                           | Study design         | Study period | Case definition                | Incidence (95% CI) |
|------------------|-------------------------------|--------------|------------------------------------------------|------------------------------------------------------|-----------------------------------------------------|----------------------|--------------|--------------------------------|--------------------|
|                  |                               |              |                                                |                                                      | 730                                                 |                      | 2009         | LB, LA, EM, LNB                | 43.9               |
|                  | Saxony                        |              |                                                |                                                      | 1,034                                               |                      | 2002         | LB, EM, LNB                    | 23.8               |
|                  |                               |              |                                                |                                                      | 1,289                                               |                      | 2003         | LB, EM, LNB                    | 29.8               |
|                  |                               |              |                                                |                                                      | 1,464                                               |                      | 2004         | LB, EM, LNB                    | 34.1               |
|                  |                               |              |                                                |                                                      | 1,636                                               |                      | 2005         | LB, EM, LNB                    | 38.3               |
|                  |                               |              |                                                |                                                      | 2,216                                               |                      | 2006         | LB, EM, LNB                    | 52.1               |
|                  |                               |              |                                                |                                                      | 1,937                                               |                      | 2007         | LB, EM, LNB                    | 45.9               |
|                  |                               |              |                                                |                                                      | 1,911                                               |                      | 2008         | LB, EM, LNB                    | 45.6               |
|                  |                               |              |                                                |                                                      | 1,668                                               |                      | 2009         | LB, LA, EM, LNB                | 39.8               |
|                  | Saxony-Anhalt                 |              |                                                |                                                      | 314                                                 |                      | 2002         | LB, EM, LNB                    | 12.3               |
|                  |                               |              |                                                |                                                      | 329                                                 |                      | 2003         | LB, EM, LNB                    | 13                 |
|                  |                               |              |                                                |                                                      | 381                                                 |                      | 2004         | LB, EM, LNB                    | 15.3               |
|                  |                               |              |                                                |                                                      | 477                                                 |                      | 2005         | LB, EM, LNB                    | 19.3               |
|                  |                               |              |                                                |                                                      | 531                                                 |                      | 2006         | LB, EM, LNB                    | 21.7               |
|                  |                               |              |                                                |                                                      | 604                                                 |                      | 2007         | LB, EM, LNB                    | 25                 |
|                  |                               |              |                                                |                                                      | 576                                                 |                      | 2008         | LB, EM, LNB                    | 24.2               |
|                  |                               |              |                                                |                                                      | 331                                                 |                      | 2009         | LB, LA, EM, LNB                | 13.9               |
|                  | Thuringia                     |              |                                                |                                                      | 8                                                   |                      | 2002         | LB, EM, LNB                    | 0.3                |
|                  |                               |              |                                                |                                                      | 245                                                 |                      | 2003         | LB, EM, LNB                    | 10.3               |
|                  |                               |              |                                                |                                                      | 265                                                 |                      | 2004         | LB, EM, LNB                    | 11.3               |
|                  |                               |              |                                                |                                                      | 442                                                 |                      | 2005         | LB, EM, LNB                    | 18.9               |
|                  |                               |              |                                                |                                                      | 675                                                 |                      | 2006         | LB, EM, LNB                    | 29.2               |
|                  |                               |              |                                                |                                                      | 425                                                 |                      | 2007         | LB, EM, LNB                    | 18.6               |
|                  |                               |              |                                                |                                                      | 541                                                 |                      | 2008         | LB, EM, LNB                    | 23.9               |
|                  |                               |              |                                                |                                                      | 608                                                 |                      | 2009         | LB, LA, EM, LNB                | 26.8               |
| Germany [116]    | East Germany                  | Wilking 2014 | Notifications to the Robert Koch Institute     | Retrospective surveillance                           | 18,894 (LB)<br>18,016 (EM)<br>367 (LA)<br>630 (LNB) |                      | 2009-2012    |                                | 34.9               |
|                  | Mecklenburg-Western Pomerania |              |                                                |                                                      |                                                     |                      | 2009         |                                |                    |
|                  | Berlin                        |              |                                                |                                                      |                                                     |                      | 2012         |                                | 19.54              |
|                  |                               |              |                                                |                                                      |                                                     |                      | 2011         |                                | 74.8               |
| Netherlands [43] | Apeldoorn and Zutphen         | Bierman 2019 | Hospital records of patients with facial palsy | Adults with facial palsy visiting the departments of | 26                                                  | Retrospective cohort | 2007-2017    | LNB<br>Clinical and laboratory | 0.9 (0.6-1.3)      |

| Country (Ref)    | Sub-national area                                                                                                                                                                                                                                                                                                                                                                   | Author Year   | Data source                    | Study Population                                        | Cases (n) | Study design       | Study period                                                                                                                                                                                                                               | Case definition                              | Incidence (95% CI)                                                                                                                                                                                     |
|------------------|-------------------------------------------------------------------------------------------------------------------------------------------------------------------------------------------------------------------------------------------------------------------------------------------------------------------------------------------------------------------------------------|---------------|--------------------------------|---------------------------------------------------------|-----------|--------------------|--------------------------------------------------------------------------------------------------------------------------------------------------------------------------------------------------------------------------------------------|----------------------------------------------|--------------------------------------------------------------------------------------------------------------------------------------------------------------------------------------------------------|
|                  |                                                                                                                                                                                                                                                                                                                                                                                     |               |                                | neurology and/or otorhinolaryngology of Gelre hospitals |           |                    |                                                                                                                                                                                                                                            |                                              |                                                                                                                                                                                                        |
| Netherlands [44] | Amsterdam                                                                                                                                                                                                                                                                                                                                                                           | Botman 2018   | Medical records                | Medical records of 56,996 patients registered in 12 GPs | 2,619     | Observational      | 2010- 2015                                                                                                                                                                                                                                 | Immunoblot confirmed cases presenting to GPs | 880                                                                                                                                                                                                    |
| Switzerland [45] | <i>All regions</i><br><i>Region 1:</i> Geneva, Neuchâtel, Vaud, Valais<br><br><i>Region 2:</i> Berne, Fribourg, Jura<br><br><i>Region 3:</i> Aargau, Basel, Solothurn<br><br><i>Region 4:</i> Lucerne, Obwalden, Nidwalden, Schwyz, Uri, Zug<br><br><i>Region 5:</i> Appenzell, Glarus, St. Gallen, Schaffhausen, Thurgau, Zurich, Lichtenstein<br><i>Region 6:</i> Grisons, Ticino | Altpeter 2013 | National surveillance database | National general population                             | 864       | Prospective cohort | 2008-2011<br>2008-2011<br>2008<br>2009<br>2010<br>2011<br>2008-2011<br>2008<br>2009<br>2010<br>2011<br>2008-2011<br>2008<br>2009<br>2010<br>2011<br>2008-2011<br>2008<br>2009<br>2010<br>2011<br>2008-2011<br>2008<br>2009<br>2010<br>2011 | EUCALB                                       | 67<br>59<br>60<br>55<br>93<br>154<br>184<br>113<br>123<br>197<br>130<br>161<br>170<br>86<br>105<br>158<br>154<br>102<br>127<br>248<br>156<br>202<br>151<br>88<br>185<br>128<br>168<br>124<br>96<br>125 |

ACA, Acrodermatitis chronica atrophicans; CDC, the United States Centers for Disease Control and Prevention; CI, confidence interval; EM, erythema migrans; EUCALB, European Union Concerted Action on Lyme borreliosis; LA, Lyme arthritis; LB, Lyme borreliosis; LC, Lyme carditis; LNB, Lyme neuroborreliosis; NR, not reported

\*Incidence *proportion* reported, rather than incidence *rate* (person-time).



**Table S7:** Cases of LB in Eastern Europe from literature published from 2005 to 2020

| Country             | National or sub-national area  | Author Year                   | Data source                                                                                                   | Study Population                         | Study design                             | Study period | Case definition                                                           | Number of cases             |
|---------------------|--------------------------------|-------------------------------|---------------------------------------------------------------------------------------------------------------|------------------------------------------|------------------------------------------|--------------|---------------------------------------------------------------------------|-----------------------------|
| Bulgaria [46]       | Sofia                          | Baymakova 2016                | Military Academy Hospital medical records                                                                     | Patients with prolonged febrile syndrome | Retrospective cohort                     | 2006-2010    | LB                                                                        | <b>2</b>                    |
| Bulgaria [47]       | National                       | Deleva 2007                   | 12 patients with LNB                                                                                          | NR                                       | Prospective cohort                       | Not given    | LNB: laboratory confirmed                                                 | <b>12</b>                   |
| Bulgaria [48]       |                                | Trifonova 2010                | Serum samples                                                                                                 | NR                                       | Prospective cohort, Sero-epidemiological | 2010         | EM<br>Disseminated LB                                                     | <b>68</b><br><b>48</b>      |
| Czech Republic [49] | Motol                          | Liba 2013                     | Hospital medical records                                                                                      | Pediatric neurology inpatients           | Retrospective cohort                     | 2009-2011    | LNB: laboratory confirmed                                                 | <b>58</b>                   |
| Czech Republic [50] | National                       | Kriz 2017                     | National Register of Hospitalised Patients                                                                    | National general population              | Retrospective cross-sectional,           | 2003-2013    | LB: ICD-10 codes                                                          | <b>23,631</b>               |
| Czech Republic [51] | Prague                         | Palecek 2010                  | Medical records                                                                                               | Cardiology inpatients (N=39)             | Prospective cross-sectional              | 2007-2008    | LNB<br><br>LB detected in endocardial biopsy (PCR or electron microscopy) | <b>6392</b><br><br><b>8</b> |
| Hungary [53]        | Budapest                       | Lakos 2010B                   | Center for Tick-borne Diseases, Budapest                                                                      | Pregnant women                           | Retrospective observational              | 1986-2008    | EM: CDC, EUCALB                                                           | <b>97</b>                   |
| Poland [54]         | Podalskie                      | Moniuszko 2014                | Medical Records, Department of Pediatric Orthopedics and Traumatology of the Medical University of Białystok. |                                          | Prospective cohort                       | 2004-2010    | LA, laboratory confirmed                                                  | <b>34</b>                   |
| Poland [55]         | National                       | Moniuszko 2020                | Serosurvey in patients with EM                                                                                | Patients with EM                         | Prospective cohort, Sero-epidemiological | 2012-2016    | Clinical                                                                  | 310                         |
| Poland [56]         | Krakow                         | Marek Kacinski 2007           | Hospital-based data                                                                                           | NR                                       | Prospective cohort                       | 2005-2006    | LNB: laboratory confirmed                                                 | <b>9</b>                    |
| Poland [57]         | Białystok                      | Krawczuk 2020                 | Medical records                                                                                               | Inpatients with LB                       | Retrospective cross-sectional            | 2004-2015    | LNB: laboratory confirmed                                                 | <b>181</b>                  |
| Poland [58]         | Kuyavian-Pomeranian Voivodship | Blazejewicz-Zawadziniska 2012 | Local surveillance records                                                                                    | NR                                       | Retrospective cohort                     | 2000-2005    | LB: confirmed by Western blot<br>EM                                       | <b>973</b><br><b>825</b>    |

| Country     | National or sub-national area | Author Year     | Data source                                                                                                      | Study Population                     | Study design                  | Study period | Case definition | Number of cases |
|-------------|-------------------------------|-----------------|------------------------------------------------------------------------------------------------------------------|--------------------------------------|-------------------------------|--------------|-----------------|-----------------|
|             |                               |                 |                                                                                                                  |                                      |                               | 2000         | LB              | 41              |
|             |                               |                 |                                                                                                                  |                                      |                               | 2001         |                 | 59              |
|             |                               |                 |                                                                                                                  |                                      |                               | 2002         |                 | 101             |
|             |                               |                 |                                                                                                                  |                                      |                               | 2003         |                 | 195             |
|             |                               |                 |                                                                                                                  |                                      |                               | 2004         |                 | 395             |
|             |                               |                 |                                                                                                                  |                                      |                               | 2005         |                 | 218             |
|             |                               |                 |                                                                                                                  |                                      |                               | 2000-2005    | EM              | 825             |
|             |                               |                 |                                                                                                                  |                                      |                               |              | LA              | 138             |
|             |                               |                 |                                                                                                                  |                                      |                               |              | LNB             | 53              |
|             |                               |                 |                                                                                                                  |                                      |                               |              | LC              | 2               |
|             |                               |                 |                                                                                                                  |                                      |                               | 2000-2005    | LB              | 18              |
|             | Aleksandrowski                |                 |                                                                                                                  |                                      |                               |              |                 | 25              |
|             | Brodnicki                     |                 |                                                                                                                  |                                      |                               |              |                 | 433             |
|             | Bygoski                       |                 |                                                                                                                  |                                      |                               |              |                 | 10              |
|             | Chełmiński                    |                 |                                                                                                                  |                                      |                               |              |                 | 15              |
|             | Golubsko-dobrzyński           |                 |                                                                                                                  |                                      |                               |              |                 | 61              |
|             | Grudziądzki                   |                 |                                                                                                                  |                                      |                               |              |                 | 37              |
|             | Inowrocławski                 |                 |                                                                                                                  |                                      |                               |              |                 | 3               |
|             | Lipnowski                     |                 |                                                                                                                  |                                      |                               |              |                 | 14              |
|             | Mogileński                    |                 |                                                                                                                  |                                      |                               |              |                 | 48              |
|             | Nakielski                     |                 |                                                                                                                  |                                      |                               |              |                 | 1               |
|             | Radziejowski                  |                 |                                                                                                                  |                                      |                               |              |                 | 5               |
|             | Rypiński                      |                 |                                                                                                                  |                                      |                               |              |                 | 13              |
|             | Sępoleński                    |                 |                                                                                                                  |                                      |                               |              |                 | 67              |
|             | Świecki                       |                 |                                                                                                                  |                                      |                               |              |                 | 115             |
|             | Toruński                      |                 |                                                                                                                  |                                      |                               |              |                 | 51              |
|             | Tucholski                     |                 |                                                                                                                  |                                      |                               |              |                 | 19              |
|             | Wąbrzeski                     |                 |                                                                                                                  |                                      |                               |              |                 | 23              |
|             | Włocławski                    |                 |                                                                                                                  |                                      |                               |              |                 | 15              |
|             | Zniński                       |                 |                                                                                                                  |                                      |                               |              |                 | 33              |
| Poland [59] | Białystok                     | Grygorczuk 2013 | Medical records of patients with disseminated LB admitted to Department of Infectious Diseases & Neuroinfections | Patients with disseminated LB (N=33) | Retrospective observational   | 2012         | LB              | 8               |
|             |                               |                 |                                                                                                                  |                                      |                               |              | LNB             | 17              |
|             |                               |                 |                                                                                                                  |                                      |                               |              | LA              | 5               |
| Poland [60] | West Pomeranian Province      | Stawicki 2017   | Retrospective analysis of                                                                                        | District sanitary-epidemiological    | Retrospective cross-sectional | 2005-2014    | LB              | 2756            |
|             |                               |                 |                                                                                                                  |                                      |                               |              | ACA             |                 |

| Country      | National or sub-national area | Author Year         | Data source                                                                                             | Study Population                                                | Study design                | Study period | Case definition                                            | Number of cases                                                   |
|--------------|-------------------------------|---------------------|---------------------------------------------------------------------------------------------------------|-----------------------------------------------------------------|-----------------------------|--------------|------------------------------------------------------------|-------------------------------------------------------------------|
|              | Białogardzki                  |                     | surveillance                                                                                            | stations (20 units)                                             |                             |              |                                                            | <b>59</b>                                                         |
|              | Choszczeński                  |                     | mandatory                                                                                               | operating in the West                                           |                             |              |                                                            | <b>73</b>                                                         |
|              | Drawski                       |                     | notification data                                                                                       | Pomeranian Province                                             |                             |              |                                                            | <b>131</b>                                                        |
|              | Goleniowski                   |                     |                                                                                                         |                                                                 |                             |              |                                                            | <b>124</b>                                                        |
|              | Gryfice                       |                     |                                                                                                         |                                                                 |                             |              |                                                            | <b>146</b>                                                        |
|              | Gryfiński                     |                     |                                                                                                         |                                                                 |                             |              |                                                            | <b>182</b>                                                        |
|              | Kołobrzeski                   |                     |                                                                                                         |                                                                 |                             |              |                                                            | <b>109</b>                                                        |
|              | Koszaliński                   |                     |                                                                                                         |                                                                 |                             |              |                                                            | <b>139</b>                                                        |
|              | Policki                       |                     |                                                                                                         |                                                                 |                             |              |                                                            | <b>155</b>                                                        |
|              | Pyrzycki                      |                     |                                                                                                         |                                                                 |                             |              |                                                            | <b>19</b>                                                         |
|              | Stargardski                   |                     |                                                                                                         |                                                                 |                             |              |                                                            | <b>60</b>                                                         |
|              | Szczecinek                    |                     |                                                                                                         |                                                                 |                             |              |                                                            | <b>106</b>                                                        |
|              | City Szczecin                 |                     |                                                                                                         |                                                                 |                             |              |                                                            | <b>761</b>                                                        |
|              | Świdwiński                    |                     |                                                                                                         |                                                                 |                             |              |                                                            | <b>79</b>                                                         |
|              | City Swinoujście              |                     |                                                                                                         |                                                                 |                             |              |                                                            | <b>140</b>                                                        |
|              | Walecki                       |                     |                                                                                                         |                                                                 |                             |              |                                                            | <b>248</b>                                                        |
|              | Mysliborski                   |                     |                                                                                                         |                                                                 |                             |              |                                                            | <b>47</b>                                                         |
|              | Sławieński                    |                     |                                                                                                         |                                                                 |                             |              |                                                            | <b>43</b>                                                         |
|              | Łobezki                       |                     |                                                                                                         |                                                                 |                             |              |                                                            | <b>40</b>                                                         |
|              | Kamiński                      |                     |                                                                                                         |                                                                 |                             |              |                                                            | <b>95</b>                                                         |
| Poland [61]  | Lublin region                 | Cisak 2008          | Hospital medical records of clinical LB cases                                                           | Regional population.                                            | Retrospective cohort        | 1998-2007    | LB<br>LA<br>LNB<br>Skin borreliosis                        | <b>15</b><br><b>11</b><br><b>1</b><br><b>3</b>                    |
| Poland [6]   | Podlaskie                     | Czupryna 2016       | Medical records Department of Infectious Diseases and Neuro-infections, Medical University in Białystok | Patients admitted with suspected LB (N=378)                     | Retrospective cohort        |              | LA: serological confirmation<br><br>LNB<br>LA<br>ACA<br>EM | <b>193</b><br><br><b>10</b><br><b>4</b><br><b>5</b><br><b>207</b> |
| Poland [62]  | Lukow                         | Tokarska-Rodak 2010 | Hospital-based data                                                                                     | Outpatients with EM<br>Inpatients with suspected LB (N=200)     | Prospective cohort          | 2007-2008    | LB positive by Western blot                                | <b>100</b>                                                        |
| Romania [63] | County of Bihor               | Constanta 2019      | Retrospective clinical archives/records                                                                 | Patients attending the Infectious Diseases hospital departments | Retrospective observational | 2018-2019    | LB                                                         | <b>132</b>                                                        |
| Romania [64] | Oradea                        | Andrei 2019         | Emergency department medical records                                                                    | NR                                                              | Prospective observational   | 2015-2018    | EM with positive serology                                  | <b>183</b>                                                        |

| Country              | National or sub-national area          | Author Year        | Data source                                               | Study Population                                                                                  | Study design                | Study period | Case definition               | Number of cases          |
|----------------------|----------------------------------------|--------------------|-----------------------------------------------------------|---------------------------------------------------------------------------------------------------|-----------------------------|--------------|-------------------------------|--------------------------|
| Romania [65]         | Cluj-Napoca                            | Lupse 2014         | Hospital medical Records                                  | NR                                                                                                | Prospective cohort          | 2011         | EM: EUCALB                    | <b>44</b>                |
| Romania [66]         | Isai                                   | Manciuc 2019       | Hospital records                                          | Patients with LB evaluated and treated at the hospital                                            | Retrospective cohort        | 2017         | LB: CDC                       | <b>89</b>                |
| Romania [67]         | Cluj-Napoca                            | Briciu 2013        | Patient interview                                         | Patients presenting to hospital with EM                                                           | Prospective observational   | 2011-2012    | EM                            | <b>40</b>                |
| Russia [68]          | Moscow                                 | Kritchevskaya 2014 | Medical records from The Helmholtz Eye Research Institute | Patients with inflammatory eye conditions                                                         | Observational               | 2013         | Ophthalmic                    | <b>3</b>                 |
| Russia [69]          | Altai region Siberian Federal district | Dedkov, 2017       | Standardized questionnaire                                | Regional general population                                                                       | Retrospective observational | 2013-2015    | IgM paired sera or IgG        | <b>17</b>                |
| Russia [70]          | St. Petersburg                         | Grineva 2019       | Children Clinical Research Center of Infectious Diseases  | Children (1—17 yrs) with admitted with suspected LB                                               | Prospective cohort          | 2010-2016    | LB<br>EM                      | <b>184</b><br><b>142</b> |
| Slovak Republic [71] | Bratislava                             | Trnovcova 2007     | Hospital-based data                                       | Patients with EM                                                                                  | Prospective cohort          | 2001-2005    | EM                            | <b>25</b>                |
| Slovenia [72]        | Ljubljana                              | Ogrinc 2016        | Medical records University Medical Centre                 | Adult patients with a clinical diagnosis of Bannwarth syndrome attending the LB outpatient clinic | Prospective cohort          | 2005-2013    | LNB: Bannwarth syndrome<br>EM | <b>77</b><br>46          |
| Slovenia [73]        | Ljubljana                              | Maraspin 2019      | Hospital medical records, University Medical Centre       | Adults diagnosed with EM<br><br>Receiving treatment with tumor necrosis factor                    | Prospective cohort          | 2009-2018    | EM                            | <b>16</b><br><b>16</b>   |
| Slovenia [74]        | Ljubljana                              | Stupica 2011       | LB Outpatient's Clinic, University Medical Center         | Adults with EM and skin biopsy                                                                    | Prospective cohort          | 2006         | EM: CDC                       | <b>252</b>               |
| Slovenia [75]        | Ljubljana                              | Stupica 2015       | LB Outpatient's Clinic, University Medical Center         | Adults with EM and skin biopsy                                                                    | Prospective cohort          | 2010         | EM: EUCALB                    | <b>252</b>               |
| Slovenia [76]        | Ljubljana                              | Arnez 2011         | Dept Infectious Disease,                                  | Consecutive children (<15yrs) with EM                                                             | Prospective cohort          | 1996-2004    | EM: CDC                       | <b>1164</b>              |

| Country       | National or sub-national area | Author Year   | Data source                                                       | Study Population                                                           | Study design       | Study period | Case definition         | Number of cases |
|---------------|-------------------------------|---------------|-------------------------------------------------------------------|----------------------------------------------------------------------------|--------------------|--------------|-------------------------|-----------------|
| Slovenia [77] | Center Ljubljana              | Maraspin 2015 | University Medical Centre Ljubljana<br>Outpatient medical records | Adults with a hematological malignancy with EM<br>Immunocompetent controls | Prospective cohort | 1992-2013    | EM: EUCALB              | <b>53</b>       |
| Ukraine [78]  | National                      | Biletska 2008 | Serological survey                                                | Sick people with suspected LB                                              | Prospective cohort | 2003-2006    | LB laboratory confirmed | <b>1650</b>     |

ACA, Acrodermatitis chronica atrophicans; CDC, the United States Centers for Disease Control and Prevention; CI, confidence interval; EM, erythema migrans; EUCALB, European Union Concerted Action on Lyme borreliosis; LA, Lyme arthritis; LB, Lyme borreliosis; LC, Lyme carditis; LNB, Lyme neuroborreliosis; NR, not reported

**Table S8:** Cases of LB in Nordic region from literature published from 2005 to 2020

| Country      | National or sub-national area                                                                                                                      | Author Year       | Data source                                                                      | Study Population     | Study design                             | Study period | Case definition                                                                                                  | Number of cases                                                                                                |
|--------------|----------------------------------------------------------------------------------------------------------------------------------------------------|-------------------|----------------------------------------------------------------------------------|----------------------|------------------------------------------|--------------|------------------------------------------------------------------------------------------------------------------|----------------------------------------------------------------------------------------------------------------|
| Denmark [79] | National                                                                                                                                           | Christiansen 2005 | Surveillance data                                                                | Denmark population   | Retrospective surveillance               | 2004         | LNB: laboratory confirmed                                                                                        | <b>63</b>                                                                                                      |
|              |                                                                                                                                                    |                   |                                                                                  |                      |                                          | 2005         |                                                                                                                  | <b>34</b>                                                                                                      |
|              |                                                                                                                                                    |                   |                                                                                  |                      |                                          | 1994-2004    |                                                                                                                  | <b>471</b>                                                                                                     |
|              |                                                                                                                                                    |                   |                                                                                  |                      |                                          | 2004-2005    |                                                                                                                  | <b>413</b>                                                                                                     |
| Denmark [80] | National                                                                                                                                           | Obel 2018         | Danish laboratories and other national registries                                | Denmark population   | Retrospective cohort                     | 1985-2016    | LNB: positive intrathecal antibody test                                                                          | <b>2067</b>                                                                                                    |
| Denmark [81] | East Zealand<br>North Zealand<br>Southwest Zealand<br>Funen<br>South Jutland<br>Mid Jutland<br>East Northwest Jutland<br>North Jutland<br>Bornholm | Tetens 2020       | Danish national registries                                                       | Denmark population   | Retrospective cohort                     | 1996-2015    | LNB: Positive intrathecal antibody test                                                                          | <b>683</b>                                                                                                     |
|              |                                                                                                                                                    |                   |                                                                                  |                      |                                          |              |                                                                                                                  | <b>266</b>                                                                                                     |
|              |                                                                                                                                                    |                   |                                                                                  |                      |                                          |              |                                                                                                                  | <b>420</b>                                                                                                     |
|              |                                                                                                                                                    |                   |                                                                                  |                      |                                          |              |                                                                                                                  | <b>409</b>                                                                                                     |
|              |                                                                                                                                                    |                   |                                                                                  |                      |                                          |              |                                                                                                                  | <b>28</b>                                                                                                      |
|              |                                                                                                                                                    |                   |                                                                                  |                      |                                          |              |                                                                                                                  | <b>463</b>                                                                                                     |
|              |                                                                                                                                                    |                   |                                                                                  |                      |                                          |              |                                                                                                                  | <b>26</b>                                                                                                      |
|              |                                                                                                                                                    |                   |                                                                                  |                      |                                          |              |                                                                                                                  | <b>425</b>                                                                                                     |
|              |                                                                                                                                                    |                   |                                                                                  |                      |                                          |              |                                                                                                                  | <b>71</b>                                                                                                      |
|              |                                                                                                                                                    |                   |                                                                                  |                      |                                          |              |                                                                                                                  | <b>2643</b>                                                                                                    |
| Denmark [82] | Copenhagen, Funen, and North Jutland                                                                                                               | Dessau 2010       | GP survey of patients with a LB serology request                                 | Regional populations | Cohort                                   | 2002-2003    | LB: EUCALB<br>EM<br>LNB<br><br>ACA<br>LC<br>Chronic LNB<br>Lymphocytoma<br>Other<br>No current clinical symptoms | <b>1011</b><br><b>340</b><br><br><b>67</b><br><b>14</b><br><b>130</b><br><b>28</b><br><b>330</b><br><b>367</b> |
| Denmark [83] | Eastern Denmark                                                                                                                                    | Gynthersen 2020   | 233 referrals of the hospital Department of Infectious Disease with suspected LB | NR                   | Prospective cohort, Sero-epidemiological | 2017-2019    | LB: laboratory confirmed<br>EM<br>LNB<br>ACA<br>Multiple EM<br>LC<br>Post-treatment LB syndrome                  | <b>45</b>                                                                                                      |
|              |                                                                                                                                                    |                   |                                                                                  |                      |                                          |              |                                                                                                                  | <b>20</b>                                                                                                      |
|              |                                                                                                                                                    |                   |                                                                                  |                      |                                          |              |                                                                                                                  | <b>14</b>                                                                                                      |
|              |                                                                                                                                                    |                   |                                                                                  |                      |                                          |              |                                                                                                                  | <b>6</b>                                                                                                       |
|              |                                                                                                                                                    |                   |                                                                                  |                      |                                          |              |                                                                                                                  | <b>4</b>                                                                                                       |
|              |                                                                                                                                                    |                   |                                                                                  |                      |                                          |              |                                                                                                                  | <b>1</b>                                                                                                       |
|              |                                                                                                                                                    |                   |                                                                                  |                      |                                          |              |                                                                                                                  | <b>12</b>                                                                                                      |

| Country      | National or sub-national area          | Author Year   | Data source                                         | Study Population                                                                    | Study design                 | Study period | Case definition                                            | Number of cases        |
|--------------|----------------------------------------|---------------|-----------------------------------------------------|-------------------------------------------------------------------------------------|------------------------------|--------------|------------------------------------------------------------|------------------------|
| Finland [84] | Helsinki                               | Kanerva 2013  | Computerized search within the health-care district | Patients of Department of Otorhinolaryngology, Helsinki University Central Hospital | Prospective cohort           | 2007-2009    | Intra-thecal antibodies and lymphocytic pleocytosis in CSF | <b>14</b>              |
| Norway [85]  | South-Rogaland district                | Oymar 2009    | Children admitted for possible LNB                  | Regional population                                                                 | Retrospective cohort         | 1996-2006    | LNB: laboratory confirmed                                  | <b>143</b>             |
| Norway [86]  | High endemicity southern coastal areas | Ljostad 2007  | Prospective hospital-based data                     | Adult > 18 years inpatients with LNB                                                | Prospective cohort           | 2004-2006    | LNB: Laboratory confirmed                                  | <b>43</b>              |
| Norway [87]  | Agder county                           | Quarsten 2017 | GP-recruited participants                           | 70 adults with tick bite and symptoms                                               | Prospective cohort, GP-based | 2014-2015    | EM PCR positive                                            | <b>65</b>              |
| Norway [88]  | National                               | Mysterud 2017 | Surveillance data                                   | Norway population                                                                   | Retrospective cohort         | 1991-2015    | Laboratory confirmed since 1995                            | <b>3424</b>            |
| Norway [89]  | South Rogaland district, Norway        | Tveitnes 2007 | Prospective data collection                         | Children <15 years admitted with facial palsy                                       | Prospective cohort           | 1996-2004    | CSF/antibody confirmation                                  | <b>142</b>             |
| Norway [90]  | Vest-Agder                             | Ljostad-2005  | Hospital based data                                 | Adults admitted with facial palsy                                                   | Prospective cohort           | 1997-1998    | CSF confirmed                                              | <b>14</b>              |
| Sweden [91]  | Greater Stockholm                      | Bagger 2005   | Children treated for LNB                            | Regional population                                                                 | Prospective case-control     | 1995-1997    | LNB                                                        | <b>255</b>             |
| Sweden [92]  | Stockholm                              | Arnason 2020  | Hospital medical records                            | Children admitted with facial palsy                                                 | Retrospective cohort         | 2014-2015    | LNB                                                        | <b>45</b>              |
| Sweden [93]  | Southern Sweden                        | Ornstein 2020 | Prospective data                                    | 207 patients with EM and LNB                                                        | Prospective cohort           | 1994-1997    | LB: CDC<br>LNB: CDC                                        | <b>75</b><br><b>80</b> |

ACA, Acrodermatitis chronica atrophicans; CDC, the United States Centers for Disease Control and Prevention; CI, confidence interval; EM, erythema migrans; EUCALB, European Union Concerted Action on Lyme borreliosis; LA, Lyme arthritis; LB, Lyme borreliosis; LC, Lyme carditis; LNB, Lyme neuroborreliosis; NR, not reported

**Table S9:** Cases of LB in the United Kingdom from literature published from 2005 to 2020

| Country | National or sub-national area | Author Year | Data source                                          | Study Population                   | Study design         | Study period | Case definition                                      | Number of cases |
|---------|-------------------------------|-------------|------------------------------------------------------|------------------------------------|----------------------|--------------|------------------------------------------------------|-----------------|
| UK [94] | London                        | Dillon 2010 | The Hospital for Tropical Diseases clinical database | Patients presenting to clinics     | Prospective cohort   | 2002-2007    | LB: Infectious Disease Society of America definition | <b>65</b>       |
| UK [95] | South west England            | Lovett 2008 | Medical record                                       | Patients with positive LB serology | Retrospective cohort | 2000-2004    | LB: serologically confirmed                          | <b>88</b>       |

ACA, Acrodermatitis chronica atrophicans; CDC, the United States Centers for Disease Control and Prevention; CI, confidence interval; EM, erythema migrans; EUCALB, European Union Concerted Action on Lyme borreliosis; LA, Lyme arthritis; LB, Lyme borreliosis; LC, Lyme carditis; LNB, Lyme neuroborreliosis; NR, not reported



**Table S10:** Cases of LB in Southern Europe from literature published from 2005 to 2020

| Country                | National or sub-national area | Author Year    | Data source                                                            | Study Population             | Study design                  | Study period | Case definition                                                                             | Number of cases |
|------------------------|-------------------------------|----------------|------------------------------------------------------------------------|------------------------------|-------------------------------|--------------|---------------------------------------------------------------------------------------------|-----------------|
| Croatia [27]           | Bjelovarsko-bilogorska county | Ropac 2013     | Institute of Public health in Bjelovar-Bilogora, Croatia               | NR                           | Retrospective cross-sectional | 2007-2011    | LB                                                                                          | 34              |
| Croatia [96]           | National                      | Dzelalija 2015 | Croatian National Institute of Public Health, Division of Epidemiology | Croatian national population | Retrospective cohort          | 2005         | Clinical and epidemiology data, serology methods (IFA, ELISA), molecular (PCR), and culture | 220             |
|                        | 2006                          |                |                                                                        |                              |                               | 301          |                                                                                             |                 |
|                        | 2007                          |                |                                                                        |                              |                               | 266          |                                                                                             |                 |
|                        | 2008                          |                |                                                                        |                              |                               | 439          |                                                                                             |                 |
|                        | 2009                          |                |                                                                        |                              |                               | 435          |                                                                                             |                 |
|                        | 2010                          |                |                                                                        |                              |                               | 492          |                                                                                             |                 |
|                        | 2011                          |                |                                                                        |                              |                               | 499          |                                                                                             |                 |
|                        | 2012                          |                |                                                                        |                              |                               | 434          |                                                                                             |                 |
|                        | 2013                          |                |                                                                        |                              |                               | 661          |                                                                                             |                 |
|                        | 2014                          |                |                                                                        |                              |                               | 470          |                                                                                             |                 |
|                        | 2005-2014                     |                |                                                                        |                              |                               | 4217         |                                                                                             |                 |
|                        | 2005-2004                     |                |                                                                        |                              |                               | 77           |                                                                                             |                 |
|                        | Bjelovarsko-bilogorska        |                |                                                                        |                              |                               | 1383         |                                                                                             |                 |
|                        | Grad Zagreb                   |                |                                                                        |                              |                               | 204          |                                                                                             |                 |
|                        | Koprivničko-križevačka        |                |                                                                        |                              |                               | 88           |                                                                                             |                 |
|                        | Virovitičko-podravska         |                |                                                                        |                              |                               | 47           |                                                                                             |                 |
|                        | Požeško-slavonska             |                |                                                                        |                              |                               | 70           |                                                                                             |                 |
|                        | Brodsko-posavske              |                |                                                                        |                              |                               | 137          |                                                                                             |                 |
|                        | Osječko-baranjska             |                |                                                                        |                              |                               | 52           |                                                                                             |                 |
|                        | Vukovarsko-srijemska          |                |                                                                        |                              |                               | 106          |                                                                                             |                 |
| Sisa~ko-moslava~ko     | 155                           |                |                                                                        |                              |                               |              |                                                                                             |                 |
| Karlovačka             | 292                           |                |                                                                        |                              |                               |              |                                                                                             |                 |
| Primorsko-goranska     | 5                             |                |                                                                        |                              |                               |              |                                                                                             |                 |
| Ličko-senjska          | 72                            |                |                                                                        |                              |                               |              |                                                                                             |                 |
| Istarska               | 3                             |                |                                                                        |                              |                               |              |                                                                                             |                 |
| Zadarska               | 0                             |                |                                                                        |                              |                               |              |                                                                                             |                 |
| Šibensko-kninska       | 13                            |                |                                                                        |                              |                               |              |                                                                                             |                 |
| Splitsko-dalmatinska   | 7                             |                |                                                                        |                              |                               |              |                                                                                             |                 |
| Dubrovačko-neretvanska | 274                           |                |                                                                        |                              |                               |              |                                                                                             |                 |
| Međimurska             | 207                           |                |                                                                        |                              |                               |              |                                                                                             |                 |
| Varaždinska            | 427                           |                |                                                                        |                              |                               |              |                                                                                             |                 |
| Krapinsko zagorska     | 598                           |                |                                                                        |                              |                               |              |                                                                                             |                 |
| Zagrebačka             |                               |                |                                                                        |                              |                               |              |                                                                                             |                 |

| Country      | National or sub-national area                                                                                                              | Author Year    | Data source                                                          | Study Population                                                           | Study design                                        | Study period | Case definition       | Number of cases |              |                          |                                     |                                |           |                              |           |
|--------------|--------------------------------------------------------------------------------------------------------------------------------------------|----------------|----------------------------------------------------------------------|----------------------------------------------------------------------------|-----------------------------------------------------|--------------|-----------------------|-----------------|--------------|--------------------------|-------------------------------------|--------------------------------|-----------|------------------------------|-----------|
| Croatia [97] | National                                                                                                                                   | Mulic 2006     | Notifications to the Croatian Institute of Public Health             | Croatian national population                                               | Retrospective cohort                                | 1988         | LB                    | <b>4</b>        |              |                          |                                     |                                |           |                              |           |
|              |                                                                                                                                            |                |                                                                      |                                                                            |                                                     | 1989         |                       | <b>4</b>        |              |                          |                                     |                                |           |                              |           |
|              |                                                                                                                                            |                |                                                                      |                                                                            |                                                     | 1990         |                       | <b>1</b>        |              |                          |                                     |                                |           |                              |           |
|              |                                                                                                                                            |                |                                                                      |                                                                            |                                                     | 1991         |                       | <b>168</b>      |              |                          |                                     |                                |           |                              |           |
|              |                                                                                                                                            |                |                                                                      |                                                                            |                                                     | 1992         |                       | <b>96</b>       |              |                          |                                     |                                |           |                              |           |
|              |                                                                                                                                            |                |                                                                      |                                                                            |                                                     | 1993         |                       | <b>306</b>      |              |                          |                                     |                                |           |                              |           |
|              |                                                                                                                                            |                |                                                                      |                                                                            |                                                     | 1994         |                       | <b>260</b>      |              |                          |                                     |                                |           |                              |           |
|              |                                                                                                                                            |                |                                                                      |                                                                            |                                                     | 1995         |                       | <b>274</b>      |              |                          |                                     |                                |           |                              |           |
|              |                                                                                                                                            |                |                                                                      |                                                                            |                                                     | 1996         |                       | <b>335</b>      |              |                          |                                     |                                |           |                              |           |
|              |                                                                                                                                            |                |                                                                      |                                                                            |                                                     | 1997         |                       | <b>229</b>      |              |                          |                                     |                                |           |                              |           |
|              |                                                                                                                                            |                |                                                                      |                                                                            |                                                     | 1998         |                       | <b>248</b>      |              |                          |                                     |                                |           |                              |           |
|              |                                                                                                                                            |                |                                                                      |                                                                            |                                                     | 1999         |                       | <b>232</b>      |              |                          |                                     |                                |           |                              |           |
|              |                                                                                                                                            |                |                                                                      |                                                                            |                                                     | 2000         |                       | <b>235</b>      |              |                          |                                     |                                |           |                              |           |
|              |                                                                                                                                            |                |                                                                      |                                                                            |                                                     | 2001         |                       | <b>313</b>      |              |                          |                                     |                                |           |                              |           |
| Italy [98]   | National<br>Endemic areas Friuli-Venezia Giulia, Trentino-Alto Adige, Liguria, Emilia-Romagna<br>Non endemic areas: other regions of Italy | Esposito 2021  | Survey of 176 pediatric infectious disease physicians Registry of LD | Children with LB (N=160: 80 living in endemic and 80 in non-endemic areas) | Cross-sectional survey                              | 2005-2011    | EUCALB                | <b>160</b>      |              |                          |                                     |                                |           |                              |           |
|              |                                                                                                                                            |                |                                                                      |                                                                            |                                                     |              | EM                    | <b>66</b>       |              |                          |                                     |                                |           |                              |           |
|              |                                                                                                                                            |                |                                                                      |                                                                            |                                                     |              | LA                    | <b>10</b>       |              |                          |                                     |                                |           |                              |           |
|              |                                                                                                                                            |                |                                                                      |                                                                            |                                                     |              | LNB                   | <b>4</b>        |              |                          |                                     |                                |           |                              |           |
|              |                                                                                                                                            |                |                                                                      |                                                                            |                                                     |              | EM                    | <b>64</b>       |              |                          |                                     |                                |           |                              |           |
|              |                                                                                                                                            |                |                                                                      |                                                                            |                                                     |              | LA                    | <b>14</b>       |              |                          |                                     |                                |           |                              |           |
|              |                                                                                                                                            |                |                                                                      |                                                                            |                                                     |              | LNB                   | <b>2</b>        |              |                          |                                     |                                |           |                              |           |
|              |                                                                                                                                            |                |                                                                      |                                                                            |                                                     |              | Italy [99]            | Latium          | Santino 2011 | Laboratory records       | Patients with serology data (N=954) | Retrospective cohort           |           | LB: serologically confirmed  | <b>42</b> |
|              |                                                                                                                                            |                |                                                                      |                                                                            |                                                     |              |                       |                 |              |                          |                                     |                                |           | EM                           | <b>21</b> |
|              |                                                                                                                                            |                |                                                                      |                                                                            |                                                     |              |                       |                 |              |                          |                                     |                                |           | LNB                          | <b>7</b>  |
| Italy [100]  | Northeast Italy                                                                                                                            | Marangoni 2008 | Serology samples                                                     | Patients with EM                                                           | Retrospective cross-sectional, sero-epidemiological | NR           | EM: Culture-confirmed | <b>66</b>       |              |                          |                                     |                                |           |                              |           |
|              |                                                                                                                                            |                |                                                                      |                                                                            |                                                     |              | Turkey [101]          | NR              | Çelik 2016   | Hospital medical records | Children with LNB                   | Retrospective cross-sectional, | 2014-2015 | LNB: serologically confirmed | <b>75</b> |

ACA, Acrodermatitis chronica atrophicans; CDC, the United.States Centers for Disease Control and Prevention; CI, confidence interval; EM, erythema migrans; EUCALB, European Union Concerted Action on Lyme borreliosis; LA, Lyme arthritis; LB, Lyme borreliosis; LC, Lyme carditis; LNB, Lyme neuroborreliosis; NR, not reported

**Table S11:** Cases of LB in Central/Western Europe from literature published from 2005 to 2020

| Country       | National or sub-national area                               | Author Year   | Data source                                                | Study Population                                                               | Study design                                        | Study period | Case definition                         | Number of cases |
|---------------|-------------------------------------------------------------|---------------|------------------------------------------------------------|--------------------------------------------------------------------------------|-----------------------------------------------------|--------------|-----------------------------------------|-----------------|
| Belgium [102] | -                                                           | Linard 2007   | Sentinel surveillance data, modelled estimates             | Nationwide general population (adult)                                          | Retrospective surveillance                          | 1994         | Laboratory confirmed cases              | ~190            |
|               |                                                             |               |                                                            |                                                                                |                                                     | 1995         |                                         | ~200            |
|               |                                                             |               |                                                            |                                                                                |                                                     | 1996         |                                         | ~250            |
|               |                                                             |               |                                                            |                                                                                |                                                     | 1997         |                                         | ~320            |
|               |                                                             |               |                                                            |                                                                                |                                                     | 1998         |                                         | ~280            |
|               |                                                             |               |                                                            |                                                                                |                                                     | 1999         |                                         | ~380            |
|               |                                                             |               |                                                            |                                                                                |                                                     | 2000         |                                         | ~400            |
|               |                                                             |               |                                                            |                                                                                |                                                     | 2001         |                                         | ~550            |
|               |                                                             |               |                                                            |                                                                                |                                                     | 2002         |                                         | ~870            |
|               |                                                             |               |                                                            |                                                                                |                                                     | 2003         |                                         | ~700            |
| 2004          | ~1400                                                       |               |                                                            |                                                                                |                                                     |              |                                         |                 |
| France [103]  | National                                                    | Trombert 2005 | Serosurvey in Pasteur-Cerba laboratory                     | Patients (N=1,330)                                                             | Retrospective cross-sectional, sero-epidemiological | 2003         | Serologically confirmed by Western blot | 425             |
| France [104]  | National                                                    | Grillon 2019  | The French National Reference Center for Borrelia database | France general population                                                      | Retrospective cohort                                | 2010-2016    | LA: Positive PCR in synovial fluid      | 37              |
| France [105]  | Besancon                                                    | Voitey 2020   | Single medical center                                      | Preferred for suspected LB                                                     | Retrospective cohort                                | 2015-2018    | LB: EUCALB                              | 48              |
|               |                                                             |               |                                                            |                                                                                |                                                     |              | LNB                                     | 17              |
|               |                                                             |               |                                                            |                                                                                |                                                     |              | EM                                      | 20              |
|               |                                                             |               |                                                            |                                                                                |                                                     |              | Early disseminated stage                | 24              |
| Other         | 7                                                           |               |                                                            |                                                                                |                                                     |              |                                         |                 |
| France [106]  | La Pitie Salpetriere Hospital, Paris                        | Kaminsky 2020 | Hospital-based data                                        | Patients with LNB                                                              | Prospective cohort                                  | 2007-2017    | LNB: laboratory confirmed               | 16              |
| France [107]  | National                                                    | Jacquet 2019  | Hospital medical records in Nancy                          | Patients referred to the hospital-based dedicated LB treatment pathway (N=468) | Retrospective cohort                                | 2016-2017    | LB: French Infectious Diseases Society  | 69              |
| France [108]  | Aquitaine, Limousin, Rhone-Alpes, Franche Comte, and Alsace | Mariet 2013   | Sentinel GP surveillance network                           | Regional population                                                            | Prospective observational                           | 2001-2012    | EM: EUCALB                              | 1453            |
|               |                                                             |               |                                                            |                                                                                |                                                     |              |                                         | 41              |
|               |                                                             |               |                                                            |                                                                                |                                                     |              |                                         | 170             |
|               |                                                             |               |                                                            |                                                                                |                                                     |              |                                         | 335             |

| Country                  | National or sub-national area | Author Year             | Data source                                                                             | Study Population                                                                              | Study design                | Study period | Case definition                                            | Number of cases |
|--------------------------|-------------------------------|-------------------------|-----------------------------------------------------------------------------------------|-----------------------------------------------------------------------------------------------|-----------------------------|--------------|------------------------------------------------------------|-----------------|
|                          | Franche Comte<br>Alsace       |                         |                                                                                         |                                                                                               |                             |              |                                                            | <b>277</b>      |
| Germany<br>[109]         | National                      | Lohr 2015               | German statutory health insurance company (DAK-G)                                       | Insured DAK-G population                                                                      | Retrospective observational | 2008-2011    | LB (ICD-10 A69.2 + Code M01.2 arthritis)                   | <b>630</b>      |
|                          |                               |                         |                                                                                         |                                                                                               |                             | 2008         |                                                            | <b>591</b>      |
|                          |                               |                         |                                                                                         |                                                                                               |                             | 2009         |                                                            | <b>512</b>      |
|                          |                               |                         |                                                                                         |                                                                                               |                             | 2010         |                                                            | <b>549</b>      |
|                          |                               |                         |                                                                                         |                                                                                               |                             | 2011         |                                                            | <b>511</b>      |
| Germany<br>[110]         | Munich                        | Buchholz 2014           | Department of Neurology at Klinikum Grosshadern, University of Munich                   | Inpatients with neuroinfectious diseases (N=376)                                              | Retrospective cohort        | 2005-2009    | LNB                                                        | <b>35</b>       |
| The Netherlands<br>[111] |                               | Broekhuijsen-van Henten | Reports to the Dutch Paediatric Surveillance system                                     | Children <18 y                                                                                | Prospective cohort          | 2006-2007    | LNB: EUCALB The Dutch Institute for Healthcare Improvement | <b>66</b>       |
| The Netherlands<br>[112] | Amsterdam                     | Nassar-2018             | Medical records from the Department of Medical Microbiology and Academic Medical Centre | Children (< 18 years) with a clinical suspicion of LB, referred to the AMC in The Netherlands | Retrospective cohort        | 2011-2015    | LB: Clinical Dx                                            | <b>38</b>       |
| Switzerland<br>[113]     | -                             | Monteventi 2018         | The Swiss Neuropediatric Stroke Registry                                                | Children with stroke                                                                          | Prospective cohort          | 2000-2015    | LNB: clinical and laboratory                               | <b>4</b>        |
|                          |                               |                         |                                                                                         |                                                                                               | Retrospective               |              | Multiple EM                                                | <b>545</b>      |
| Switzerland<br>[114]     | Neuchatel                     | Huegli 2011             | Questionnaire and blood samples                                                         | Residents presenting after tick bite in an endemic area (N=474)                               | Prospective cohort          | 2003-2005    | LB confirmed by Western blot<br>EM                         | <b>12</b>       |
|                          |                               |                         |                                                                                         |                                                                                               |                             |              |                                                            | <b>14</b>       |

ACA, Acrodermatitis chronica atrophicans; CDC, the United States Centers for Disease Control and Prevention; EM, erythema migrans; EUCALB, European Union Concerted Action on Lyme borreliosis; LA, Lyme arthritis; LB, Lyme borreliosis; LC, Lyme carditis; LNB, Lyme neuroborreliosis; NR, not reported

### Footnote for all Supplement Tables

Incidence estimates and 95% CIs have been rounded to the first decimal to the right for consistent level of precision.

## References

- [1] Daniel M, Kříž B, Valter J, Kott I, Danielová V. The influence of meteorological conditions of the preceding winter on the incidences of tick-borne encephalitis and Lyme borreliosis in the Czech Republic. *Int J Med Microbiol* 2008;298:60-7. <https://dx.doi.org/10.1016/j.ijmm.2008.05.001>.
- [2] Toczyłowski K, Bojkiewicz E, Barszcz M, Wozinska-Klepadlo M, Potocka P, Sulik A. Etiology, Clinical Presentation and Incidence of Infectious Meningitis and Encephalitis in Polish Children. *J Clin Med* 2020;9: <https://dx.doi.org/10.3390/jcm9082324>.
- [3] Zbrzeźniak J, Paradowska-Stankiewicz I. Lyme disease in Poland in 2017. *Przegl Epidemiol* 2019;73:317-20. <https://dx.doi.org/10.32394/pe.73.37>.
- [4] Paradowska-Stankiewicz I. Lyme disease in Poland in 2013. *Przegl Epidemiol* 2015;69:763-4 (En), 897-8 (Pl).
- [5] Krzyżak M, Paszko A, Filipkowska M, Maślach D. Lyme borreliosis in Podlaskie Province in 2011-2018 – trend analysis. *Medycyna Ogólna i Nauki o Zdrowiu* 2019;25:235-9. <https://dx.doi.org/10.26444/monz/114443>.
- [6] Czupryna P, Moniuszko-Malinowska A, Pancewicz S, Garkowski A, Goscik J, Siemieniako A, et al. Lyme disease in Poland - A serious problem? *Adv Med Sci* 2016;61:96-100. <https://dx.doi.org/10.1016/j.advms.2015.10.007>.
- [7] Stefanoff P, Rosińska M, Zieliński A. Epidemiology of tick-borne diseases in Poland. *Przegl Epidemiol* 2006;60:151-9.
- [8] Țilea B, Tripon G, Voidăzan S, Țilea I. Serological, clinical and epidemiological aspects of Lyme borreliosis in Mures County, Romania. *Revista Română de Medicină de Laborator* 2014;22:233-44.
- [9] Bogachkina S, Rakitin I, Meltser A, Parkov O, Chhindzheria I, Antyikova L, et al. Importance of acaricide treatment for prevention of natural focal infections of tick-borne encephalitis and Lyme borreliosis in St. Petersburg. *EpiNorth - Journal of the Network for Communicable Disease Control in Northern and Eastern Europe* 2011;12:76-81.
- [10] Bochníčková M, Szilágyiová M, Gardlík R. Lyme borreliosis - epidemiological analysis of incidence in the northern region of Slovakia. *Epidemiologie, Mikrobiologie, Imunologie* 2012;61:3-8.
- [11] Petrulioniene A, Radzisauskiene D, Paulauskas A, Venalis A. Lyme Disease among Patients at an Ambulatory Unit in a Highly Endemic Country: Lithuania. *Medicina (Kaunas)* 2021;57: <https://dx.doi.org/10.3390/medicina57020184>.
- [12] Dessau RB, Espenhain L, Mølbak K, Krause TG, Voldstedlund M. Improving national surveillance of Lyme neuroborreliosis in Denmark through electronic reporting of specific antibody index testing from 2010 to 2012. *Eurosurveillance* 2015;20:21184.
- [13] Andreassen AM, Dehlendorff PB, Knudtzen FC, Bødker R, Kjær LJ, Skarphédinsson S. Spatial and temporal patterns of Lyme Neuroborreliosis on Funen, Denmark from 1995-2014. *Sci Rep* 2020;10:7796.
- [14] Knudtzen FC, Andersen NS, Jensen TG, Skarphédinsson S. Characteristics and clinical outcome of Lyme neuroborreliosis in a high endemic area, 1995-2014: a retrospective cohort study in Denmark. *Clin Infect Dis* 2017;65:1489-95.
- [15] Krabbe NV, Jensen TE, Nielsen HI. [Neuroborreliosis in North Jutland]. *Ugeskr Laeger* 2008;170:3420-4.
- [16] Sajanti E, Virtanen M, Helve O, Kuusi M, Lyytikäinen O, Hytönen J, et al. Lyme borreliosis in Finland, 1995-2014. *Emerg Infect Dis* 2017;23:1282-8. <https://dx.doi.org/10.3201/eid2308.161273>.
- [17] Tveitnes D, Natås OB, Skadberg Ø, Øymar K. Lyme meningitis, the major cause of childhood meningitis in an endemic area: a population based study. *Arch Dis Child* 2012;97:215-20.
- [18] Eliassen KE, Berild D, Reiso H, Grude N, Christophersen KS, Finckenhagen C, et al. Incidence and antibiotic treatment of erythema migrans in Norway 2005-2009. *Ticks Tick Borne Dis* 2017;8:1-8. <https://dx.doi.org/10.1016/j.ttbdis.2016.06.006>.
- [19] Bennet L, Halling A, Berglund J. Increased incidence of Lyme borreliosis in southern Sweden following mild winters and during warm, humid summers. *European Journal of Clinical*

- Microbiology & Infectious Diseases 2006;25:426-32. <https://dx.doi.org/10.1007/s10096-006-0167-2>.
- [20] Sodermark L, Sigurdsson V, Nas W, Wall P, Trollfors B. Neuroborreliosis in Swedish Children: A Population-based Study on Incidence and Clinical Characteristics. *Pediatr Infect Dis J* 2017;36:1052-6. <https://dx.doi.org/10.1097/INF.0000000000001653>.
- [21] Vellinga A, Kilkelly H, Cullinan J, Hanahoe B, Cormican M. Geographic distribution and incidence of Lyme borreliosis in the west of Ireland. *Irish Journal of Medical Science* 2018;187:435-40.
- [22] Mavin S, Watson EJ, Evans R. Distribution and presentation of Lyme borreliosis in Scotland - analysis of data from a national testing laboratory. *J R Coll Physicians Edinb* 2015;45:196-200. <https://dx.doi.org/10.4997/JRCPE.2015.304>.
- [23] Milner RM, Mavin S, Ho-Yen DO. Lyme borreliosis in Scotland during two peak periods. *J R Coll Physicians Edinb* 2009;39:196-9.
- [24] Slack GS, Mavin S, Yirrell D, Ho-Yen DO. Is Tayside becoming a Scottish hotspot for Lyme borreliosis? *J R Coll Physicians Edinb* 2011;41:5-8. <https://dx.doi.org/10.4997/JRCPE.2011.102>.
- [25] Cairns V, Wallenhorst C, Rietbrock S, Martínez C. Incidence of Lyme disease in the UK: a population-based cohort study. *BMJ Open* 2019;9:e025916. <https://dx.doi.org/10.1136/bmjopen-2018-025916>.
- [26] Mulić R, Petković B, Klišmanić Z, Jerončić I. Tick-borne diseases in the Republic of Croatia. *Lijecnicki Vjesnik* 2011;133:89-95.
- [27] Ropac D, Holubek M, Grgić V, Srašević I. Lyme disease in the area of Bjelovarsko-bilogorska County - negligible or neglected disease. *Croatian Journal of Infection* 2013;33:21-6.
- [28] Zanzani SA, Rimoldi SG, Manfredi M, Grande R, Gazzonis AL, Merli S, et al. Lyme borreliosis incidence in Lombardy, Italy (2000-2015): Spatiotemporal analysis and environmental risk factors. *Ticks Tick Borne Dis* 2019;10:101257. <https://dx.doi.org/10.1016/j.ttbdis.2019.07.001>.
- [29] Vázquez-López ME, Pego-Reigosa R, Díez-Morrondo C, Castro-Gago M, Díaz P, Fernández G, et al. Epidemiology of Lyme disease in a healthcare area in north-west Spain. *Gac Sanit* 2015;29:213-6. <https://dx.doi.org/10.1016/j.gaceta.2015.01.008>.
- [30] Vázquez-López ME, Díez-Morrondo C, Sánchez-Andrade A, Pego-Reigosa R, Díaz P, Castro-Gago M. Articular manifestations in patients with Lyme disease. *Reumatol Clin* 2016;12:327-30.
- [31] Vazquez-Lopez ME, Perez-Pacin R, Diez-Morrondo C, Diaz P, Castro-Gago M. [Lyme disease in paediatrics]. *An Pediatr (Barc)* 2016;84:234-5. <https://dx.doi.org/10.1016/j.anpedi.2015.07.008>.
- [32] Geebelen L, Van Cauteren D, Devleeschauwer B, Moreels S, Tersago K, Van Oyen H, et al. Combining primary care surveillance and a meta-analysis to estimate the incidence of the clinical manifestations of Lyme borreliosis in Belgium, 2015-2017. *Ticks Tick Borne Dis* 2019;10:598-605. <https://dx.doi.org/10.1016/j.ttbdis.2018.12.007>.
- [33] Raguet S, Strat YI, Chouin L, Hansmann Y, Martinot M, Kieffer P, et al. Incidence of Lyme borreliosis in the Alsace districts: alsace)tique study 2014-2015, France. *Bulletin Épidémiologique Hebdomadaire* 2018;406-12.
- [34] Septfons A, Goronflot T, Jaulhac B, Roussel V, De Martino S, Guerreiro S, et al. Epidemiology of Lyme borreliosis through two surveillance systems: the national Sentinelles GP network and the national hospital discharge database, France, 2005 to 2016. *Eurosurveillance* 2019;24: <https://dx.doi.org/10.2807/1560-7917.es.2019.24.11.1800134>.
- [35] Beytout J, George JC, Malaval J, Garnier M, Beytout M, Baranton G, et al. Lyme borreliosis incidence in two French departments: correlation with infection of Ixodes ricinus ticks by *Borrelia burgdorferi sensu lato*. *Vector Borne Zoonotic Dis* 2007;7:507-17. <https://dx.doi.org/10.1089/vbz.2006.0633>.
- [36] Tessier S, Strat YI, Serre A, Leroy J, Martino Sd, Jaulhac B, et al. Study on Lyme borreliosis and six others tick-borne diseases, Franche-Comté (France), 2010-2012. *Bulletin Épidémiologique Hebdomadaire* 2018;413-8.

- [37] Schmitt M, Encrenaz N, Chubilleau C, Verrier A. Epidemiological data on Lyme disease in Alsace, Limousin and Rhône-Alpes. *Bulletin Épidémiologique Hebdomadaire* 2006;202-3.
- [38] Letrilliart L, Ragon B, Hanslik T, Flahault A. Lyme disease in France: a primary care-based prospective study. *Epidemiology and Infection* 2005;133:935-42.
- [39] Fulop B, Poggensee G. Epidemiological situation of Lyme borreliosis in Germany: surveillance data from six Eastern German States, 2002 to 2006. *Parasitol Res* 2008;103 Suppl 1:S117-20. <https://dx.doi.org/10.1007/s00436-008-1060-y>.
- [40] Heinzinger S, Böhmer M, Belting A, Liebl B, Wildner M, Sing A, et al. LYDI-Sentinel and mandatory reporting of Lyme borreliosis monitoring in Bavaria from 2013 to 2016. 2017;300-3.
- [41] Mehnert WH, Krause G. [HTML] Surveillance of Lyme borreliosis in Germany, 2002 and 2003. *Euro surveillance : bulletin européen sur les maladies transmissibles = European communicable disease bulletin* 2005;10:83-5.
- [42] Adlhoch C, Poggensee G. Lyme-Borreliose: Ein Situationsbericht aus den sechs östlichen Bundesländern 2007–2009. In: Editor, editor.^editors. *Book Lyme-Borreliose: Ein Situationsbericht aus den sechs östlichen Bundesländern 2007–2009*; 2010: p. 5-8.
- [43] Bierman SM, van Kooten B, Vermeeren YM, Brintjes TD, van Hees BC, Bruinsma RA, et al. Incidence and characteristics of Lyme neuroborreliosis in adult patients with facial palsy in an endemic area in the Netherlands. *Epidemiol Infect* 2019;147:1-6.
- [44] Botman E, Ang CW, Joosten JHK, Slottje P, van der Wouden JC, Maarsingh OR. Diagnostic behaviour of general practitioners when suspecting Lyme disease: a database study from 2010-2015. *BMC family practice* 2018;19:43.
- [45] Altpeter E, Zimmermann H, Oberreich J, Peter O, Dvorak C, Swiss Sentinel Surveillance N. Tick related diseases in Switzerland, 2008 to 2011. *Swiss Med Wkly* 2013;143:w13725. <https://dx.doi.org/10.4414/smw.2013.13725>.
- [46] Baymakova M, Plochev K, Dikov I, Kundurdjiev T, Popov GT, Kovaleva V. The prevalence of vector-borne diseases among patients with fever of unknown origin in a Bulgarian hospital. *Archives of Hellenic Medicine* 2016;33:656-60.
- [47] Deleva N, Kaprelyan A, Geneva S, Tzoukeva A, Dimitrov I. Cranial and spinal neuropathy in Lyme neuroborreliosis. *Journal of IMAB - Annual Proceeding (Scientific Papers)* 2007;13:54-6.
- [48] Trifonova I, Gladnishka T, Tasseva E, Ivanova V, Christova I. Human serum reactivity against *Borrelia* OspC, OspA, FlaB and VlsE protein antigens in early and disseminated Lyme borreliosis. *Probl Inf Parasit Dis* 2010;38:11-4.
- [49] Libá-Vrabelová Z, Kayserová J, Komárek V. Frequent incidence of Lyme neuroborreliosis in children in the Czech Republic. *Ceska a Slovenska Neurologie a Neurochirurgie* 2013;76:63-9.
- [50] Kříž B, Malý M, Daniel M. Neuroborreliosis in patients hospitalised for Lyme borreliosis in the Czech Republic in 2003 - 2013. *Epidemiol Mikrobiol Imunol* 2017;66:115-23.
- [51] Palecek T, Kuchynka P, Hulinska D, Schramlova J, Hrbackova H, Vitkova I, et al. Presence of *Borrelia burgdorferi* in endomyocardial biopsies in patients with new-onset unexplained dilated cardiomyopathy. *Med Microbiol Immunol* 2010;199:139-43. <https://dx.doi.org/10.1007/s00430-009-0141-6>.
- [52] !!! INVALID CITATION !!! [55];
- [53] Lakos A, Solymosi N. Maternal Lyme borreliosis and pregnancy outcome. *Int J Infect Dis* 2010;14:e494-e8.
- [54] Moniuszko A, Popko J, Guszczyn T, Waliński T, Żukiewicz-Sobczak W, Pancewicz S. Lyme disease with effusion either in hip or knee in children from Podlaskie region treated in clinic in 2004-2010. *Przegl Epidemiol* 2014;68:425-8, 535-7 (PI).
- [55] Moniuszko-Malinowska A, Dunaj J, Andersson MO, Czupryna P, Zajkowska J, Guziejko K, et al. Assessment of *Anaplasma phagocytophilum* presence in early Lyme borreliosis manifested by erythema migrans skin lesions. *Travel Med Infect Dis* 2020;36:101648. <https://dx.doi.org/10.1016/j.tmaid.2020.101648>.
- [56] Kaciński M, Zajac A, Skowronek-Bała B, Krocza S, Gergont A, Kubik A. CNS Lyme disease manifestation in children. *Przegląd lekarski* 2007;64:38-40.

- [57] Krawczuk K, Czupryna P, Pancewicz S, Oldak E, Krol M, Moniuszko-Malinowska A. Comparison of Neuroborreliosis Between Children and Adults. *Pediatr Infect Dis J* 2020;39:7-11. <https://dx.doi.org/10.1097/INF.0000000000002493>.
- [58] Błaziejewicz-Zawadzińska M, Brochocka A, Lisińska J, Borowiecki M. [A retrospective analysis of 973 patients with lyme borreliosis in Kuyavian-Pomeranian voivodship in 2000-2005]. *Przegląd epidemiologiczny* 2012;66:581-6.
- [59] Grygorczuk S, Peter O, Kondrusik M, Moniuszko A, Zajkowska J, Dunaj J, et al. Assessment of the frequency of different *Borrelia burgdorferi* sensu lato species in patients with Lyme borreliosis from north-east Poland by studying preferential serologic response and DNA isolates. *Ann Agric Environ Med* 2013;20:21-9.
- [60] Stawicki T. Studies on Lyme disease incidence rates in selected groups of forestry workers in West Pomerania, 2005-2014. *Med Pr* 2017;68:211-20.
- [61] Cisak E, Chmielewska-Badora J, Zwoliński J, Wójcik-Fatla A, Zając V, Skórska C, et al. Study on Lyme borreliosis focus in the Lublin Region (Eastern Poland). *Annals of Agricultural and Environmental Medicine* 2008;15:327-32.
- [62] Tokarska-Rodak M, Fota-Markowska H, Śmiechowicz F, Gajownik B, Prokop M, Modrzewska R, et al. Antibodies against in vivo *B. burgdorferi* antigens evaluated in patients with lyme arthritis with reference to treatment. *Advances in Clinical and Experimental Medicine* 2010;19:489-96.
- [63] Constanta T, Veronica H. Incidence of Lyme disease in Bihor county in 2018-2019 in compared with 2012-2014. *Analele Universitatii din Oradea, Fascicula: Ecotoxicologie, Zootehnie si Tehnologii de Industrie Alimentara* 2019;18:293-303.
- [64] Andrei C. Epidemiological and clinical issues of patients with thick bites and first stage Lyme disease, in Bihor county. *Analele Universitatii din Oradea, Fascicula: Ecotoxicologie, Zootehnie si Tehnologii de Industrie Alimentara* 2019;18:261-6.
- [65] Lupșe M, Briciu V, Flonta M, Nastase V, Todor N, Kullberg B-J. Serological and Clinical one year follow-up of Patients with Erythema migrans treated in a Romanian Infectious Disease Hospital. *Romanian Review of Laboratory Medicine* 2014;22: <https://dx.doi.org/10.2478/rrlm-2014-0021>.
- [66] Manciuc C, Vata A, Filip-Ciubotaru F, Luca MC, Largu A, Iordan IF. Environmental changes in North-Eastern Romania - a trigger factor for Lyme disease. *Environmental Engineering and Management Journal* 2019;18:775-9.
- [67] Briciu VT, Țățulescu DF, Flonta MMM, Năstase V, Cârștina D, Lupșe MS. Tick bites and Erythema migrans in Transylvania. *Scientia Parasitologica* 2013;14:21-9.
- [68] Kritchevskaya GI, Vakhova ES, Vylivannaya OB, Davydova GA. The rate of detection and diagnostic significance of antibodies to borrelia burgdorferi in patients with eyes diseases of inflammatory nature. *Klinicheskaya Laboratornaya Diagnostika* 2014;53-6.
- [69] Dedkov VG, Simonova EG, Beshlebova OV, Safonova MV, Stukolova OA, Verigina EV, et al. The burden of tick-borne diseases in the Altai region of Russia. *Ticks Tick Borne Dis* 2017;8:787-94. <https://dx.doi.org/10.1016/j.ttbdis.2017.06.004>.
- [70] Grineva AA, Skripchenko NV. Clinical and Pathogenetic Peculiarities of Borreliosis Infection in Children. *Pediatrics Journal named after GN Speransky* 2019;98:45-52. <https://dx.doi.org/10.24110/0031-403x-2019-98-1-45-52>.
- [71] Trnovcova M, Bazovska S, Svecova D. Antibodies to *Borrelia burgdorferi* in erythema migrans patients. *Bratisl Lek Listy* 2007;108:399-402.
- [72] Ogrinc K, Lusa L, Lotrič-Furlan S, Bogovič P, Stupica D, Cerar T, et al. Course and outcome of early European lyme neuroborreliosis (Bannwarth syndrome): clinical and Laboratory findings. *Clin Infect Dis* 2016;63:346-53.
- [73] Maraspin V, Bogovic P, Rojko T, Ogrinc K, Ruzic-Sabljić E, Strle F. Early Lyme Borreliosis in Patients Treated with Tumour Necrosis Factor-Alpha Inhibitors. *J Clin Med* 2019;8: <https://dx.doi.org/10.3390/jcm8111857>.
- [74] Stupica D, Lusa L, Cerar T, Ruzic-Sabljić E, Strle F. Comparison of post-Lyme Borreliosis symptoms in erythema migrans patients with positive and negative *Borrelia burgdorferi* sensu lato skin culture. *Vector Borne Zoonotic Dis* 2011;11:883-9. <https://dx.doi.org/10.1089/vbz.2010.0018>.



- [75] Stupica D, Lusa L, Maraspin V, Bogovič P, Vidmar D, O'Rourke M, et al. Correlation of culture positivity, PCR positivity, and burden of *Borrelia burgdorferi* sensu lato in skin samples of erythema migrans patients with clinical findings. *PLoS One* 2015;10:e0136600.
- [76] Arnež M, Ružič-Sabljić E. *Borrelia burgdorferi* sensu lato bacteremia in Slovenian children with solitary and multiple erythema migrans. *Pediatr Infect Dis J* 2011;30:988-99.
- [77] Maraspin V, Ružič-Sabljić E, Lusa L, Strle F. Course and outcome of early Lyme borreliosis in patients with hematological malignancies. *Clin Infect Dis* 2015;61:427-31.
- [78] Biletska H, Podavalenko L, Semenyshyn O, Lozynskyj I, Tarasyuk O. Study of Lyme borreliosis in Ukraine. *International Journal of Medical Microbiology* 2008;298:154-60. <https://dx.doi.org/10.1016/j.ijmm.2008.04.004>.
- [79] Christiansen A, Mølbak K. Neuroborreliose 1994-2004. Statens Serum Institut. EPI-NYT17 August 2005.
- [80] Obel N, Dessau RB, Krogfelt KA, Bodilsen J, Andersen NS, Moller JK, et al. Long term survival, health, social functioning, and education in patients with European Lyme neuroborreliosis: nationwide population based cohort study. *BMJ* 2018;361:k1998. <https://dx.doi.org/10.1136/bmj.k1998>.
- [81] Tetens MM, Haahr R, Dessau RB, Krogfelt KA, Bodilsen J, Andersen NS, et al. Changes in Lyme neuroborreliosis incidence in Denmark, 1996 to 2015. *Ticks Tick Borne Dis* 2020;11:101549. <https://dx.doi.org/10.1016/j.ttbdis.2020.101549>.
- [82] Dessau RB, Bangsborg JM, Ejlersen T, Skarphedinsson S, Schønheyder HC. Utilization of serology for the diagnosis of suspected Lyme borreliosis in Denmark: survey of patients seen in general practice. *BMC Infect Dis* 2010;10:(1 November 2010).
- [83] Gyntheren RMM, Tetens MM, Orbaek M, Haahr R, Fana V, Hansen K, et al. Classification of patients referred under suspicion of tick-borne diseases, Copenhagen, Denmark. *Ticks Tick Borne Dis* 2021;12:101591. <https://dx.doi.org/10.1016/j.ttbdis.2020.101591>.
- [84] Kanerva M, Nissinen J, Moilanen K, Mäki M, Lahdenne P, Pitkäranta A. Microbiologic findings in acute facial palsy in children. *Otology & neurotology : official publication of the American Otological Society, American Neurotology Society [and] European Academy of Otology and Neurotology* 2013;34:e82-7.
- [85] Oymar K, Tveitnes D. Clinical characteristics of childhood Lyme neuroborreliosis in an endemic area of northern Europe. *Scand J Infect Dis* 2009;41:88-94. <https://dx.doi.org/10.1080/00365540802593453>.
- [86] Ljostad U, Skarpaas T, Mygland A. Clinical usefulness of intrathecal antibody testing in acute Lyme neuroborreliosis. *Eur J Neurol* 2007;14:873-6. <https://dx.doi.org/10.1111/j.1468-1331.2007.01799.x>.
- [87] Quarsten H, Grankvist A, Hoyvoll L, Myre IB, Skarpaas T, Kjelland V, et al. *Candidatus* *Neoehrlichia mikurensis* and *Borrelia burgdorferi* sensu lato detected in the blood of Norwegian patients with erythema migrans. *Ticks Tick Borne Dis* 2017;8:715-20. <https://dx.doi.org/10.1016/j.ttbdis.2017.05.004>.
- [88] Mysterud A, Jore S, Osteras O, Viljugrein H. Emergence of tick-borne diseases at northern latitudes in Europe: a comparative approach. *Sci Rep* 2017;7:16316. <https://dx.doi.org/10.1038/s41598-017-15742-6>.
- [89] Tveitnes D, Oymar K, Natas O. Acute facial nerve palsy in children: how often is it Lyme borreliosis? *Scand J Infect Dis* 2007;39:425-31. <https://dx.doi.org/10.1080/00365540601105764>.
- [90] Ljostad U, Okstad S, Topstad T, Mygland A, Monstad P. Acute peripheral facial palsy in adults. *J Neurol* 2005;252:672-6. <https://dx.doi.org/10.1007/s00415-005-0715-1>.
- [91] Bagger-Sjoberg D, Remahl S, Ericsson M. Long-term outcome of facial palsy in neuroborreliosis. *Otol Neurotol* 2005;26:790-5. <https://dx.doi.org/10.1097/01.mao.0000178148.98762.00>.
- [92] Arnason S, Hultcrantz M, Nilsson A, Laestadius A. Peripheral facial nerve palsy in children in a *Borrelia* high-endemic area, a retrospective follow-up study. *Acta Paediatr* 2020;109:1229-35. <https://dx.doi.org/10.1111/apa.15063>.
- [93] Ornstein K, Berglund J, Nilsson I, Norrby R, Bergstrom S. Characterization of Lyme borreliosis isolates from patients with erythema migrans and neuroborreliosis in southern

- Sweden. *J Clin Microbiol* 2001;39:1294-8. <https://dx.doi.org/10.1128/JCM.39.4.1294-1298.2001>.
- [94] Dillon R, O'Connell S, Wright S. Lyme disease in the UK: Clinical and laboratory features and response to treatment. *Clinical Medicine, Journal of the Royal College of Physicians of London* 2010;10:454-7.
- [95] Lovett JK, Evans PH, O'Connell S, Gutowski NJ. Neuroborreliosis in the South West of England. *Epidemiol Infect* 2008;136:1707-11.
- [96] Dželalija B, Medić A, Novosel IP, Sablić S. Zoonoses in the Republic of Croatia. *Croatian Journal of Infection* 2015;35:45-51.
- [97] Mulić R, Antonijević S, Klišmanić Z, Ropac D, Lučev O. Epidemiological characteristics and clinical manifestations of Lyme borreliosis in Croatia. *Mil Med* 2006;171:1105-9.
- [98] Esposito S, Baggi E, Villani A, Norbedo S, Pellegrini G, Bozzola E, et al. Management of paediatric Lyme disease in non-endemic and endemic areas: data from the Registry of the Italian Society for Pediatric Infectious Diseases. *Eur J Clin Microbiol Infect Dis* 2013;32:523-9. <https://dx.doi.org/10.1007/s10096-012-1768-6>.
- [99] Santino I, Longobardi V. Clinical and serological features of patients with suspected lyme borreliosis. *Int J Immunopathol Pharmacol* 2011;24:797-801.
- [100] Marangoni A, Moroni A, Accardo S, Cevenini R. *Borrelia burgdorferi* VlsE antigen for the serological diagnosis of Lyme borreliosis. *Eur J Clin Microbiol Infect Dis* 2008;27:349-54. <https://dx.doi.org/10.1007/s10096-007-0445-7>.
- [101] Celik T, Celik U, Kömür M, Tolunay O, Yildizdas RD, Yagci-Kupeli B, et al. Pediatric Lyme Neuroborreliosis: Different clinical presentations of the same agent; Single center experience. *Neuro Endocrinol Lett* 2016;37:107-13.
- [102] Linard C, Lamarque P, Heyman P, Ducoffre G, Luyasu V, Tersago K, et al. Determinants of the geographic distribution of Puumala virus and Lyme borreliosis infections in Belgium. *Int J Health Geogr* 2007;6:15. <https://dx.doi.org/10.1186/1476-072X-6-15>.
- [103] Trombert-Paolantoni S, Ferquel E, Postic D. [Retrospective study of Lyme borreliosis positive serologies in 2003]. *Pathol Biol (Paris)* 2005;53:522-6. <https://dx.doi.org/10.1016/j.patbio.2005.06.010>.
- [104] Grillon A, Scherlinger M, Boyer PH, De Martino S, Perdriger A, Blasquez A, et al. Characteristics and clinical outcomes after treatment of a national cohort of PCR-positive Lyme arthritis. *Semin Arthritis Rheum* 2019;48:1105-12.
- [105] Voitey M, Bouiller K, Chirouze C, Fournier D, Bozon F, Klopfenstein T. Functional signs in patients consulting for presumed Lyme borreliosis. *Med Mal Infect* 2020;50:423-7. <https://dx.doi.org/10.1016/j.medmal.2019.10.011>.
- [106] Kaminsky AL, Maisonobe T, Lenglet T, Psimaras D, Debs R, Viala K. Confirmed cases of Neuroborreliosis with involvement of peripheral nervous system: Description of a cohort. *Medicine* 2020;99:e21986.
- [107] Jacquet C, Goehringer F, Baux E, Conrad JA, Ganne Devonec MO, Schmutz JL, et al. Multidisciplinary management of patients presenting with Lyme disease suspicion. *Med Mal Infect* 2019;49:112-20. <https://dx.doi.org/10.1016/j.medmal.2018.06.002>.
- [108] Mariet AS, Retel O, Avocat H, Serre A, Schapman L, Schmitt M, et al. Estimated incidence of erythema migrans in five regions of France and ecological correlations with environmental characteristics. *Vector Borne Zoonotic Dis* 2013;13:666-73. <https://dx.doi.org/10.1089/vbz.2012.1199>.
- [109] Lohr B, Muller I, Mai M, Norris DE, Schoffski O, Hunfeld KP. Epidemiology and cost of hospital care for Lyme borreliosis in Germany: lessons from a health care utilization database analysis. *Ticks Tick Borne Dis* 2015;6:56-62. <https://dx.doi.org/10.1016/j.ttbdis.2014.09.004>.
- [110] Buchholz G, Ormanns S, Pfister HW, Koedel U, Klein M. Neuroinfectious diseases at a European neurological tertiary care center: one-third of patients require treatment in the neurological intensive care unit. *Eur J Neurol* 2014;21:1500-3. <https://dx.doi.org/10.1111/ene.12379>.
- [111] Broekhuijsen-van Henten DM, Braun KP, Wolfs TF. Clinical presentation of childhood neuroborreliosis; neurological examination may be normal. *Arch Dis Child* 2010;95:910-4. <https://dx.doi.org/10.1136/adc.2009.176529>.

- [112] Nassar-Sheikh Rashid A, Boele Van Hensbroek M, Kolader M, Hovius JW, Pajkrt D. Lyme borreliosis in children: A tertiary referral hospital-based retrospective analysis. *Pediatr Infect Dis J* 2018;37:e45-e7.
- [113] Monteventi O, Steinlin M, Regényi M, Roulet-Perez E, Weber P, Fluss J. Pediatric stroke related to Lyme neuroborreliosis: Data from the Swiss NeuroPaediatric Stroke Registry and literature review. *Eur J Paediatr Neurol* 2018;22:113-21.
- [114] Huegli D, Moret J, Rais O, Moosmann Y, Erard P, Malinverni R, et al. Prospective study on the incidence of infection by *Borrelia burgdorferi sensu lato* after a tick bite in a highly endemic area of Switzerland. *Ticks Tick Borne Dis* 2011;2:129-36.  
<https://dx.doi.org/10.1016/j.ttbdis.2011.05.002>.
- [116] Wilking H, Stark K. Trends in surveillance data of human Lyme borreliosis from six federal states in eastern Germany, 2009-2012. *Ticks Tick Borne Dis*. 2014;5(3):219-224.  
doi:10.1016/j.ttbdis.2013.10.010
